# Supplementary material for: Subfunctionalization of a monolignol to a phytoalexin glucosyltransferase is accompanied by substrate inhibition
Source: PubMed Central journal article supplement — Plant Commun. 2022 Dec 24;4(3):100506. doi: 10.1016/j.xplc.2022.100506 (PMC10203274; doi:10.1016/j.xplc.2022.100506), 2022-12-24
Supplement: mmc1.pdf [file mmc1.pdf]

**Plant Communications, Volume 4**

**Supplemental information**

**Subfunctionalization of a monolignol to a phytoalexin glucosyltransferase is accompanied by substrate inhibition**

**Jieren Liao, Guangxin Sun, Elisabeth Kurze, Wieland Steinchen, Timothy D. Hoffmann, Chuankui Song, Zhiwei Zou, Thomas Hoffmann, and Wilfried G. Schwab**

# SUPPLEMENTAL MATERIAL

## Subfunctionalization of a monoglucosyltransferase to a phytoalexin glucosyltransferase is accompanied by substrate inhibition

Jieren Liao<sup>1#</sup>, Guangxin Sun<sup>1#, a</sup>, Elisabeth Kurze<sup>1#</sup>, Wieland Steinchen<sup>2</sup>, Timothy D. Hoffmann<sup>1</sup>, Chuankui Song<sup>3</sup>, Thomas Hoffmann<sup>1</sup>, Wilfried G. Schwab<sup>1\*</sup>

<sup>1</sup>Biotechnology of Natural Products, Technische Universität München, Liesel-Beckmann-Str. 1, 85354 Freising, Germany

<sup>2</sup>Center for Synthetic Microbiology (SYNMIKRO) & Faculty of Chemistry, Philipps-University Marburg, Karl-von-Frisch-Straße 14, 35043 Marburg, Germany

<sup>3</sup>State Key Laboratory of Tea Plant Biology and Utilization, International Joint Laboratory on Tea Chemistry and Health Effects, Anhui Agricultural University, 230036 Hefei, Anhui, P. R. China

Present address:

<sup>a</sup> Department of Molecular Biophysics and Biochemistry, Yale University, New Haven, Connecticut, USA

# These authors contributed equally to this work

\* Corresponding author

**Table S1. Kinetics of NbUGT72AY1 and StUGT72AY2 towards different substrates.** Experimental data were determined by UDP-Glo™ Glycosyltransferase assay and fitted to the partial uncompetitive inhibition model (Eq. 4). Complete uncompetitive inhibition is achieved when  $v_i$  is 0. The concentration of UDP-Glc in the reactions was kept fixed (100  $\mu$ M).

|                     | $v_{max}$<br>(nmol/min/mg) | $v_i$<br>(nmol/min/mg) | $K_m$<br>( $\mu$ M) | $K_i$<br>( $\mu$ M) | n           | x         | R    |
|---------------------|----------------------------|------------------------|---------------------|---------------------|-------------|-----------|------|
| <b>NbUGT72AY1</b>   |                            |                        |                     |                     |             |           |      |
| scopoletin          | 265.6 +/- 23.6             | 9 +/- 4                | 3.1 +/- 0.5         | 4.6 +/- 1.4         | 2 +/- 0.5   | 1 +/- 0.1 | 0.96 |
| umbelliferone       | 270.9 +/- 17.5             | 29.2 +/- 4.8           | 9.4 +/- 0.8         | 41.2 +/- 7.9        | 2 +/- 0.3   | 1 +/- 0.1 | 0.98 |
| vanillin            | 243.4 +/- 15.2             | 12.6 +/- 8.5           | 15.9 +/- 3          | 98.8 +/- 25.4       | 1 +/- 0.2   | 1 +/- 0.1 | 0.98 |
| carvacrol           | 252.4 +/- 23               | 108.8 +/- 2.2          | 9.0 +/- 4.2         | 44.8 +/- 7.2        | 1 +/- 0.1   | 2 +/- 0.2 | 0.99 |
| coniferyl aldehyde  | 59.2 +/- 4.1               | 0                      | 76.8 +/- 13.3       | 1023.3 +/- 105.7    | 1 +/- 0.1   | 2 +/- 0.3 | 0.99 |
| coniferyl alcohol   | 98.4 +/- 8.3               | 0                      | 74.4 +/- 14.7       | 760.6 +/- 75.3      | 1 +/- 0.1   | 2 +/- 0.4 | 0.98 |
| 4-coumaryl aldehyde | 35.1 +/- 5.9               | 0                      | 84.8 +/- 31.5       | 683.9 +/- 124.3     | 1 +/- 0.2   | 2 +/- 0.5 | 0.96 |
| 4-coumaryl alcohol  | 16.7 +/- 0.7               | 0                      | 0.7 +/- 0.4         | 1090.8 +/- 132.4    | 0.5 +/- 0.1 | 2 +/- 0.6 | 0.95 |
| sinapyl aldehyde    | 38.6 +/- 6.1               | 0                      | 20.4 +/- 12.4       | 2055.9 +/- 755.7    | 0.5 +/- 0.1 | 3 +/- 1.5 | 0.88 |
| sinapyl alcohol     | 55 +/- 6.4                 | 0                      | 23.4 +/- 6.9        | 676.6 +/- 76        | 1.5 +/- 0.3 | 4 +/- 0.9 | 0.97 |
| <b>StUGT72AY2</b>   |                            |                        |                     |                     |             |           |      |
| scopoletin          | 13.6 +/- 1.3               | 8.8 +/- 0.3            | 18.4 +/- 2.5        | 294.1 +/- 91.0      | 0.5 +/- 0.1 | 2 +/- 0.6 | 0.99 |
| vanillin*           | 15.3 +/- 0.6               |                        | 62.9 +/- 10.6       |                     |             |           |      |
| carvacrol           | 28.8 +/- 8.1               | 0                      | 221.1 +/- 98.4      | 1277.3 +/- 746.3    | 1 +/- 0.1   | 1 +/- 0.3 | 0.99 |
| coniferyl aldehyde* | 21.6 +/- 1.4               |                        | 145.8 +/- 45.0      |                     |             |           |      |
| coniferyl alcohol*  | 18.9 +/- 0.5               |                        | 62.6 +/- 8.1        |                     |             |           | 0.99 |
| sinapyl aldehyde    | 42.4 +/- 4                 | 0                      | 18.5 +/- 156.9      | 1370.2 +/- 0        | 1 +/- 0.1   | 2 +/- 0.2 | 0.99 |
| sinapyl alcohol*    | 39.4 +/- 2.8               |                        | 139.6 +/- 29.3      |                     |             |           | 0.99 |

The abbreviations are  $v_{max}$ : the maximal reaction rate;  $K_m$ : Michaelis-Menton constant reflecting the substrate concentration at which the reaction rate is half of  $v_{max}$ ;  $K_i$ : the inhibition constant which is the concentration of inhibitor required to decrease the maximal rate of the reaction to half of the uninhibited value;  $v_i$ : the reaction velocity in the presence of inhibition; n, x: Hill coefficient; \* Substrates marked with an asterisk show Michaelis-Menten kinetics (Equation 1).

**Table S3. List of primers**

| <b>Name</b>                           | <b>Sequence</b>                                |
|---------------------------------------|------------------------------------------------|
| NbUGT72AY1-Forward                    | GAAGATCTATGGATAGCTCACAACCTT                    |
| NbUGT72AY1-Reverse                    | CCCTCGAGTTACAACCTCTCTGCTCCG                    |
| NbUGT72AY1- Mutant I86V;F87I-Forward  | TAATAAATTCAGCACTAAAGTTATCACTCAATTACGACTATTGGT  |
| NbUGT72AY1- Mutant I86V;F87I-Reverse  | ACCAATAGTCGTAATTGAGTGATAACTTTAGTGCTGGAATTTATTA |
| NbUGT72AY1- Mutant H390Y –Forward     | TTGCATGGCCATTATACGCTGAACAAAAAATG               |
| NbUGT72AY1- Mutant H390Y – Reverse    | CATTTTTTGTTCAGCGTATAATGGCCATGCAA               |
| NbUGT72AY1 Chimeric N Term Forward    | CCCCCGGGTATGGATAGCTCACAACCTT                   |
| NbUGT72AY1 Chimeric C Term Reverse    | CCCTCGAGTTACAACCTCTCTGCTCCG                    |
| NbUGT72AY1 Chimeric Start Forward     | GCTATATATTGTCAAGTTATCGACCAAGAG                 |
| NbUGT72AY1 Chimeric Start Reverse     | CTCTTGGTTCGATAACTTGACAATATATAGC                |
| NbUGT72AY1 Chimeric End Forward       | GTACACGTGCTTCGATGGAATATTGATTAA                 |
| NbUGT72AY1 Chimeric End Reverse       | TTAATCAATATTCCATCGAAGCACGTGTAC                 |
| NbUGT72AY1- Mutant N27D -Forward      | CTAGTCTTAGGCGACCGATTAGCCACT                    |
| NbUGT72AY1- Mutant N27D - Reverse     | AGTGGCTAATCGGTGCGCTAAGACTAG                    |
| StUGT72AY2- Mutant I86V;F87I -Forward | GACAGTACGACCAAGATCTTCACGCAACTGCGTCTG           |
| StUGT72AY2- Mutant I86V;F87I -Reverse | CAGACGCAGTTGCGTGAAGATCTTGGTTCGACTGTC           |
| StUGT72AY2- Mutant H390Y –Forward     | ATCGCGTGGCCGCTGCACGCGGAACAGAAGATGAAT           |
| StUGT72AY2- Mutant H390Y - Reverse    | ATTCATCTTCTGTTCCGCGTGCACGCGGCCACGCGAT          |
| StUGT72AY2 Chimeric N Term Forward    | CGGAATTCATGGATAATACCCAGCTCCA                   |
| StUGT72AY2 Chimeric C Term Reverse    | ATTTGCGGCCGCTTAGCGCGTGC GGATATCC               |
| StUGT72AY2 Chimeric Start Forward     | TTTATCTACCAGCAAGTTTTTCGACAAAGAA                |
| StUGT72AY2 Chimeric Start Reverse     | TTCTTTGTGCGAAAACCTTGCTGGTAGATAAA               |
| StUGT72AY2 Chimeric End Forward       | TACAGATTTTGATGGTATCCTCATCAACAC                 |
| StUGT72AY2 Chimeric End Reverse       | GTGTTGATGAGGATACCATCAAAATCTGTA                 |
| StUGT72AY2- Mutant N27D -Forward      | CCAGTGCTGGTCTGGGTGACCGCCTCGCGACCAAC            |
| StUGT72AY2- Mutant N27D - Reverse     | GTTGGTTCGCGAGGCGGTCACCCAGCACCAGCACTGG          |
| NbUGT72AY1- Mutant R91A - Forward     | AAATTTTCACTCAATTAGCACTATTGGTCCGTGAAG           |
| NbUGT72AY1- Mutant R91A - Reverse     | CTTCACGGACCAATAGTGCTAATTGAGTGAAAATTT           |
| NbUGT72AY1- Mutant R91M - Forward     | AAATTTTCACTCAATTAATGCTATTGGTCCGTGAAG           |
| NbUGT72AY1- Mutant R91M - Reverse     | CTTCACGGACCAATAGCATTAAATTGAGTGAAAATTT          |
| NbUGT72AY1- Mutant R91F - Forward     | AAATTTTCACTCAATTATTCTATTGGTCCGTGAAG            |
| NbUGT72AY1- Mutant R91F - Reverse     | CTTCACGGACCAATAGGAATAATTGAGTGAAAATTT           |
| NbUGT72AY1- Mutant I86V - Forward     | TAAATTCAGCACTAAAGTTTTCACTCAATTACGACTATT        |
| NbUGT72AY1- Mutant I86V - Reverse     | AATAGTCGTAATTGAGTGAAAACCTTTAGTGCTGGAATTTA      |
| NbUGT72AY1- Mutant F87I - Forward     | TAAATTCAGCACTAAAATTATCACTCAATTACGACTATT        |
| NbUGT72AY1- Mutant F87I - Reverse     | AATAGTCGTAATTGAGTGATAATTTAGTGCTGGAATTTA        |

**Table S4. Diagnostic ions and ion traces for the detection of products by LC-MS.**

| <b>Products</b>                 | <b>Diagnostic ions for detection of the products</b> | <b>Ion trace (m/z)</b> | <b>Retention time (min)</b> |
|---------------------------------|------------------------------------------------------|------------------------|-----------------------------|
| Scopoletin glucoside            | [M+Cl] <sup>-</sup>                                  | 389                    | 9.1                         |
|                                 | [M+HCOO] <sup>-</sup>                                | 399                    |                             |
| Carvacrol glucoside             | [M+Na] <sup>+</sup>                                  | 335                    | 11.0                        |
| Sinapyl aldehyde glucoside      | [M+Cl] <sup>-</sup>                                  | 405                    | 9.4                         |
|                                 | [M+HCOO] <sup>-</sup>                                | 415                    |                             |
| Sinapyl alcohol 4-O-glucoside   | [M+Cl] <sup>-</sup>                                  | 407                    | 21.9                        |
|                                 | [M+HCOO] <sup>-</sup>                                | 417                    |                             |
| Sinapyl alcohol 1-O-glucoside   | [M+Cl] <sup>-</sup>                                  | 407                    | 23.3                        |
|                                 | [M+HCOO] <sup>-</sup>                                | 417                    |                             |
| Coniferyl aldehyde glucoside    | [M+Cl] <sup>-</sup>                                  | 377                    | 9.1                         |
|                                 | [M+HCOO] <sup>-</sup>                                | 387                    |                             |
| Coniferyl alcohol 4-O-glucoside | [M+Cl] <sup>-</sup>                                  | 377                    | 20.0                        |
|                                 | [M+HCOO] <sup>-</sup>                                | 387                    |                             |
| Coniferyl alcohol 1-O-glucoside | [M+Cl] <sup>-</sup>                                  | 377                    | 23.7                        |
|                                 | [M+HCOO] <sup>-</sup>                                | 387                    |                             |

# NbUGT72AY1 expression data

# StUGT72AY2 expression data

Nbv6.1trP2283

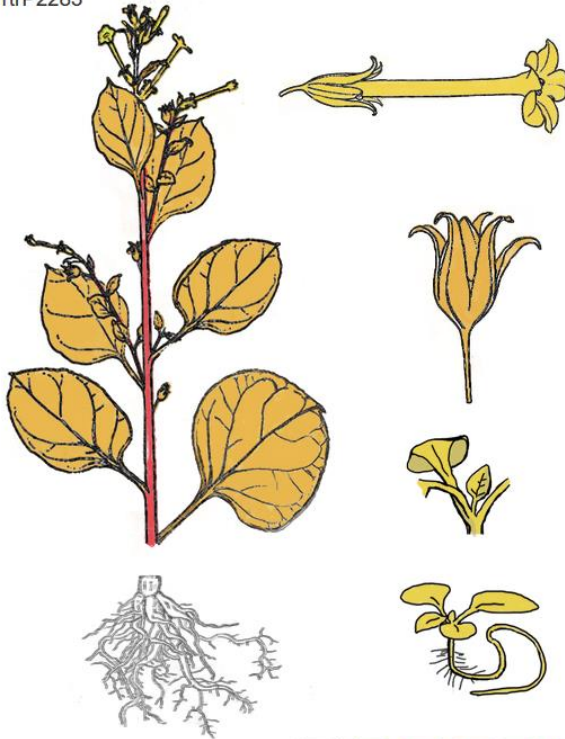

% Max Expression:  0  20  40  60  80  100

Nbv6.1trP2283 NCBI NR prediction:  
anthocyanidin 3-o-glucosyltransferase 5-like  
[Further details click Gene Ontology](#)

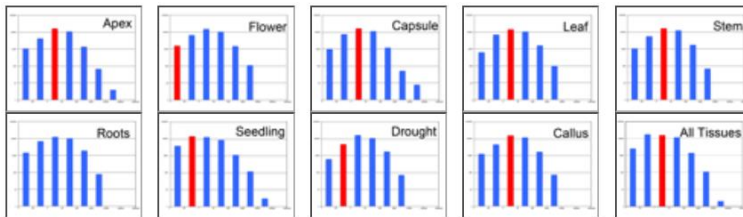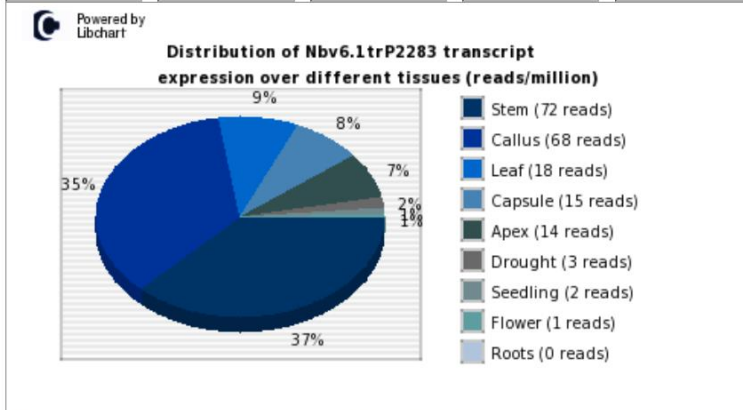

Histograms (not visible by Firefox): NbUGT72AY1 expression is in the red bar category in the tissue transcriptome profile. Bar height - number of genes in category. Category bars (left to right) 0.1, 1, 10, 100, 1000, and 10000.

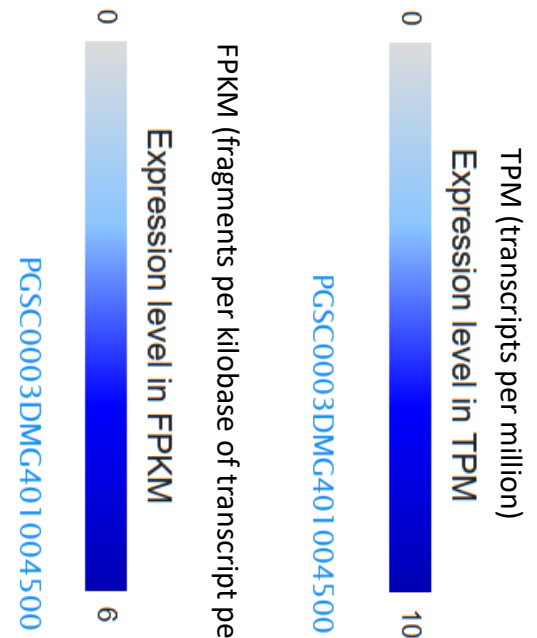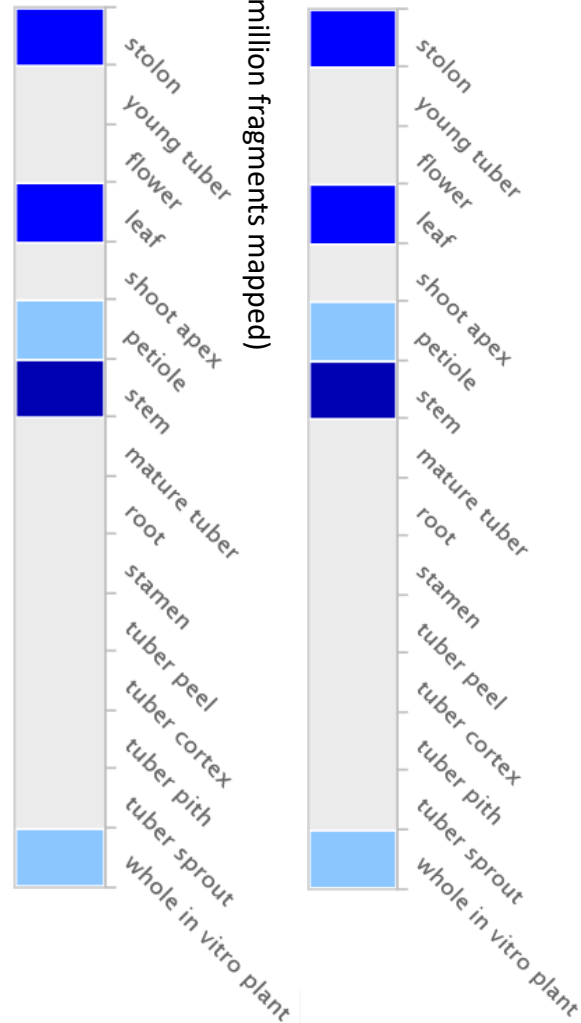

**Fig. S1 NbUGT72AY1 and StUGT72AY2 expression data** retrieved from <https://sefapps02.qut.edu.au/atlas/tREXXX2new6.php?TriD=Nbv6.1trP2283;> (December 20, 2021) and [www.ebi.ac.uk/gxa/experiments/E-MTAB-552/;](http://www.ebi.ac.uk/gxa/experiments/E-MTAB-552/) accession PGSC0003DMG401004500; (December 20, 2021), respectively.

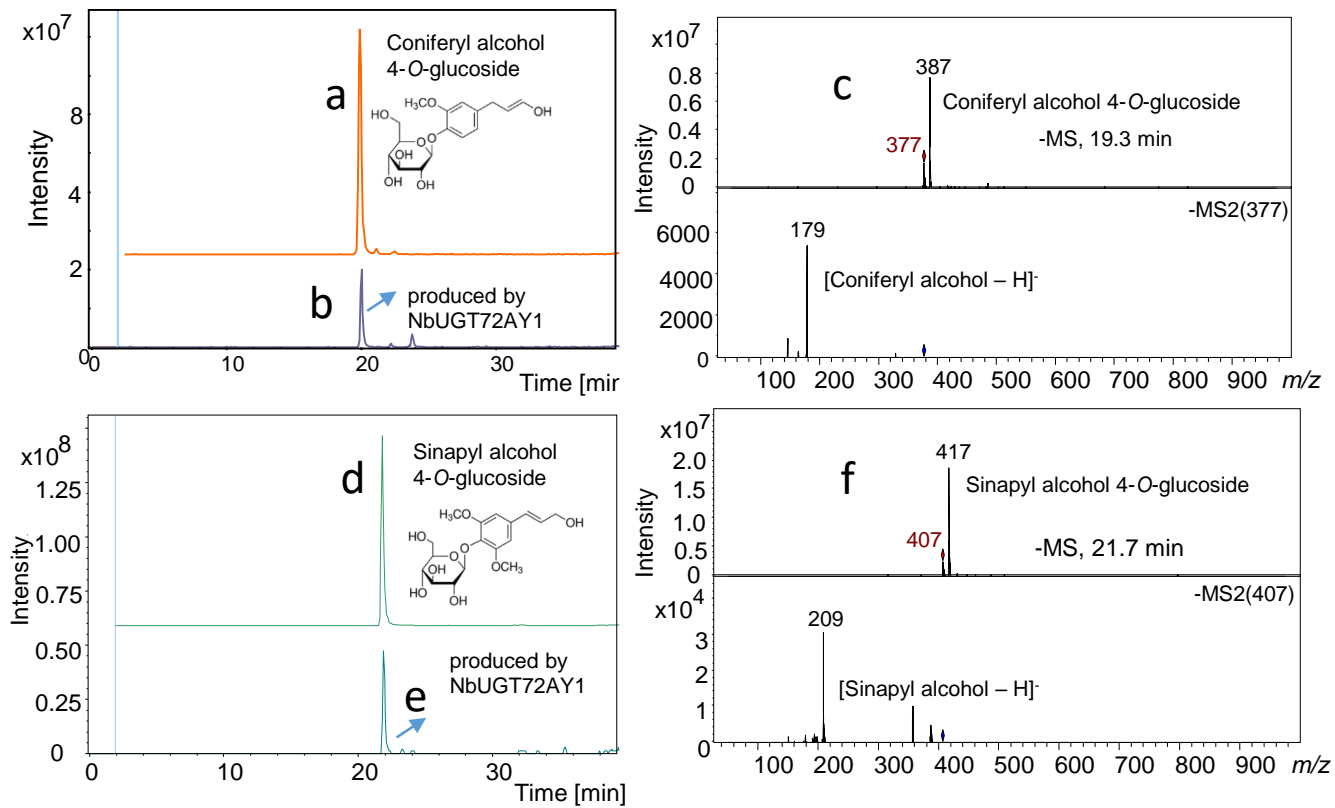

**Fig. S2. LC-MS analysis of reference material and products formed after the incubation of coniferyl alcohol and sinapyl alcohol with NbUGT72AY1. a** Reference coniferyl alcohol 4-O-glucoside. **b** enzymatic product. **c** MS and MS2 of the product. **d** Reference sinapyl alcohol 4-O-glucoside. **e** enzymatic product. **f** MS and MS2 of the product.

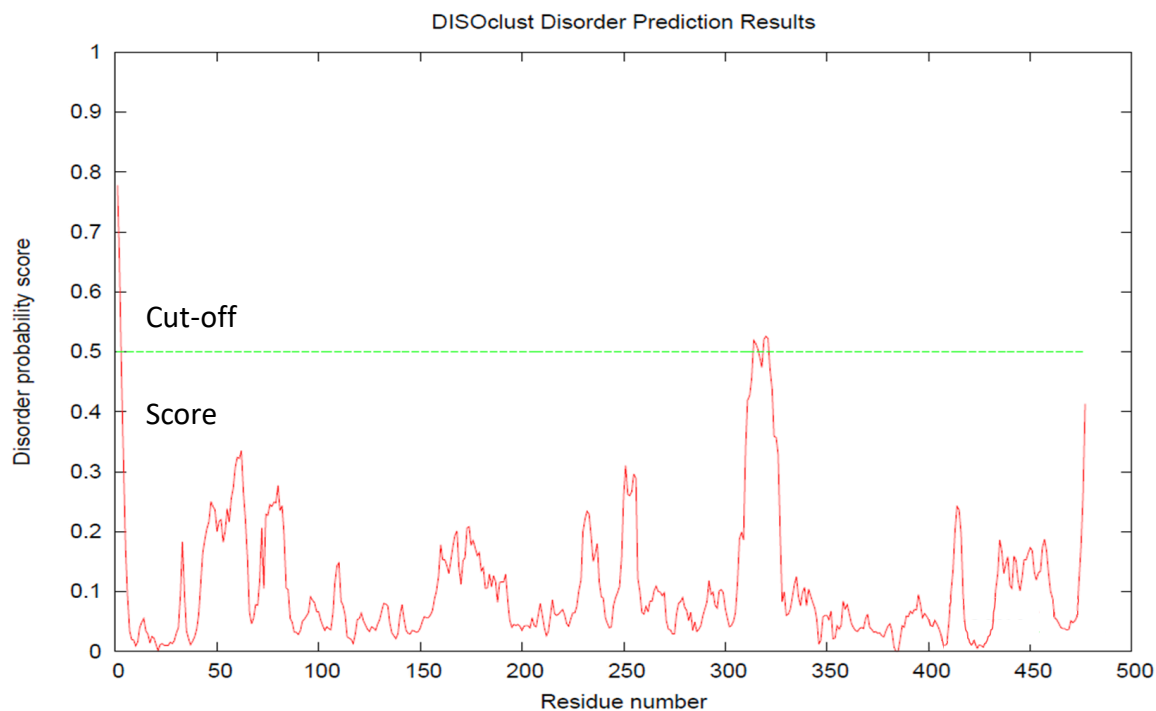

**Fig. S3.** Disorder prediction graph for the 3D model of NbUGT72AY1. Calculated by the IntFOLD server according to (McGuffin et al., 2019). Cut-off value (green line) and score of individual amino acids (red line) are shown.

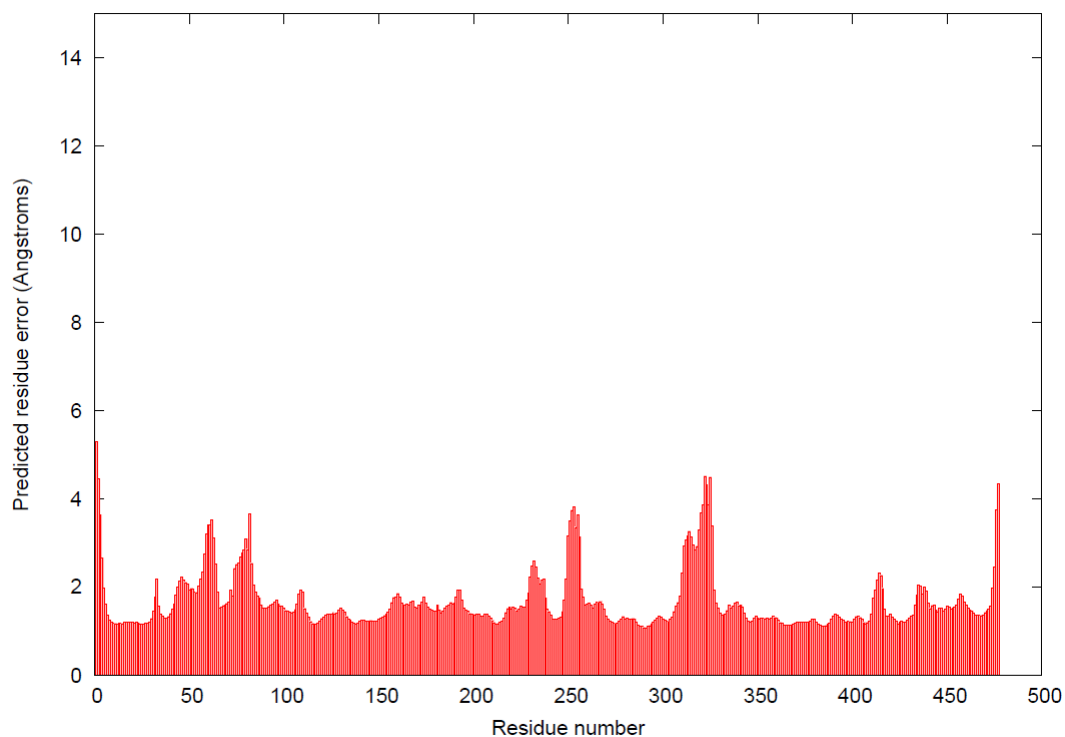

**Fig. S4.** Local NbUGT72AY1 model quality plot calculated by the IntFOLD server (McGuffin et al., 2021).



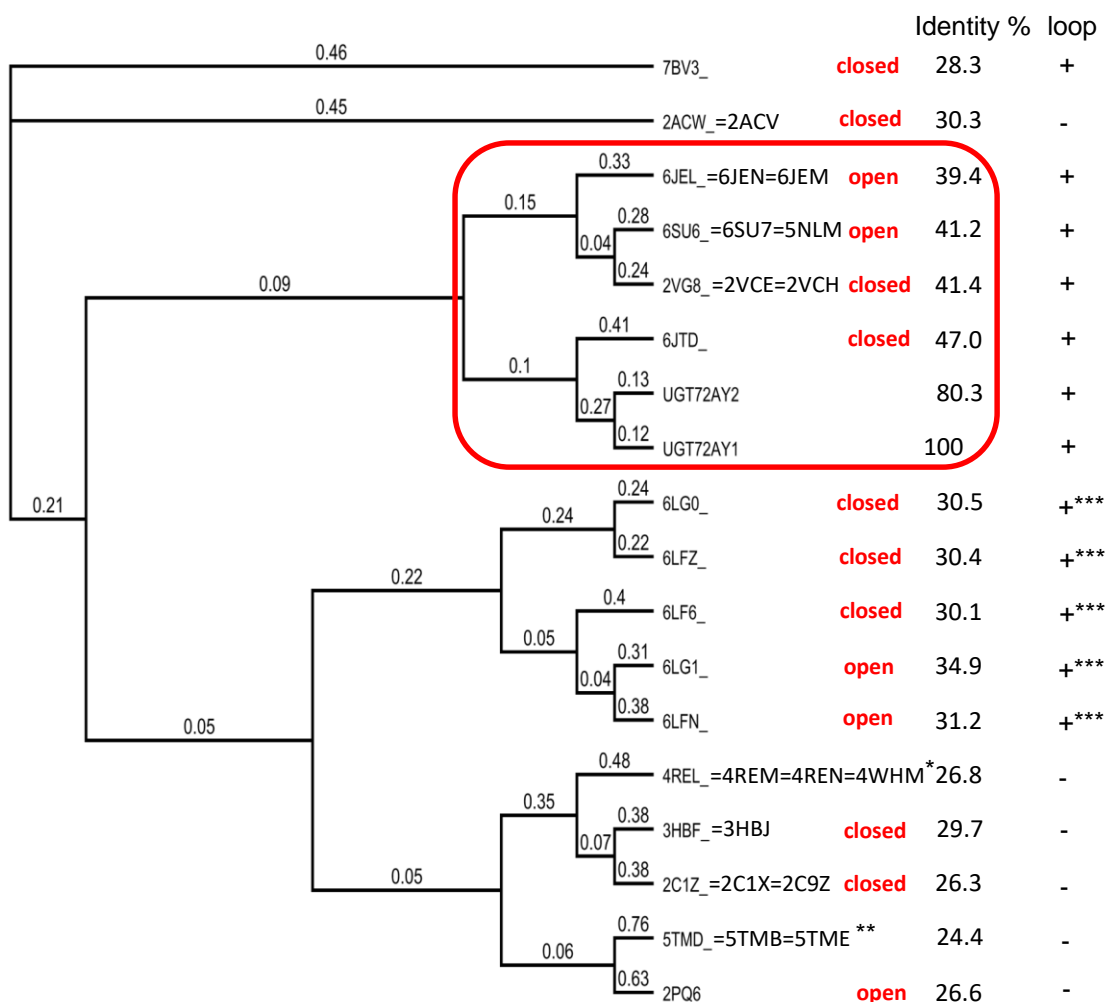

**Fig S5. Phylogenetic tree of family 1 glycosyltransferases (GT1) according to the CAZy database ([www.cazy.org/GlycosylTransferases.html](http://www.cazy.org/GlycosylTransferases.html)) whose 3D structures have been elucidated.** The tree shows the accession numbers of the Protein Data Bank ([www.rcsb.org](http://www.rcsb.org)) and their amino acid sequence identities with NbUGT72AY1. The decision of closed and open conformer was based on the orientation of the first amino acid Trp of the PSPG box. \* open and closed conformers were found. Trp appears to rotate during soaking. \*\* Trp is replaced by Phe. Two different alignments of Phe are discernible. Structures containing a similar flexible loop (aa 312-330) as in 6JTD are marked in the last column. \*\*\* The loop contains about 10 amino acids less than the proteins at the top.

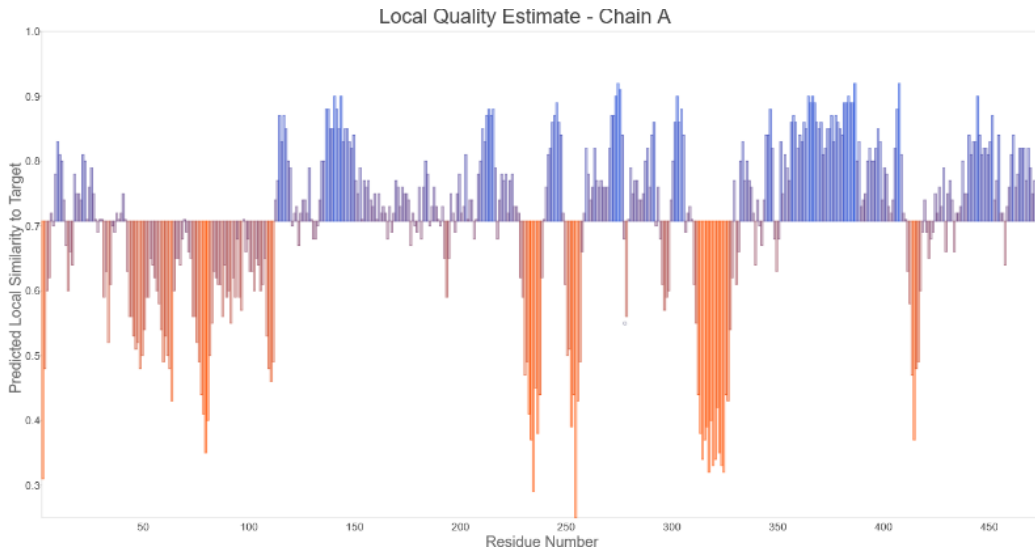

**Fig. S6.** Local quality estimate of the 3D model of NbUGT72AY1 (open conformer) calculated by the SWISS MODEL server according to (Waterhouse et al., 2018).

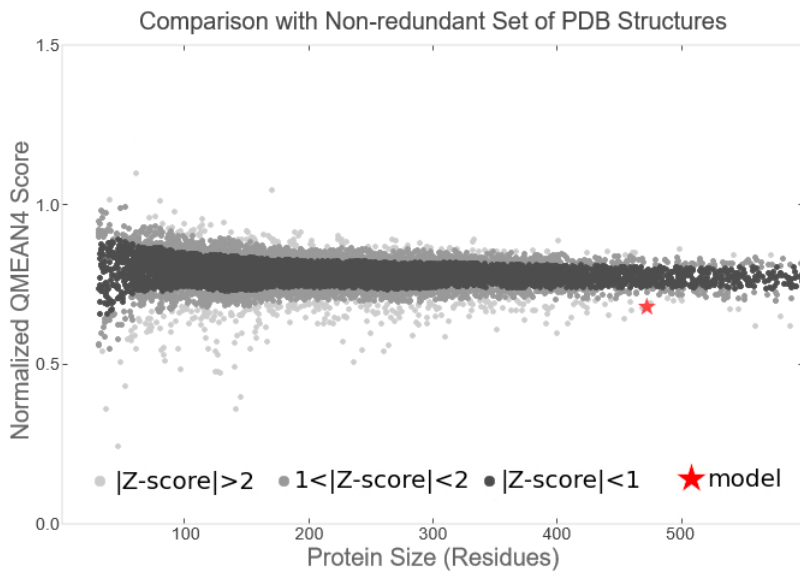

**Fig. S7.** Quality assessment of the 3D model of NbUGT72AY1 (open conformer) calculated by the SWISS MODEL server according to (Waterhouse et al., 2018).

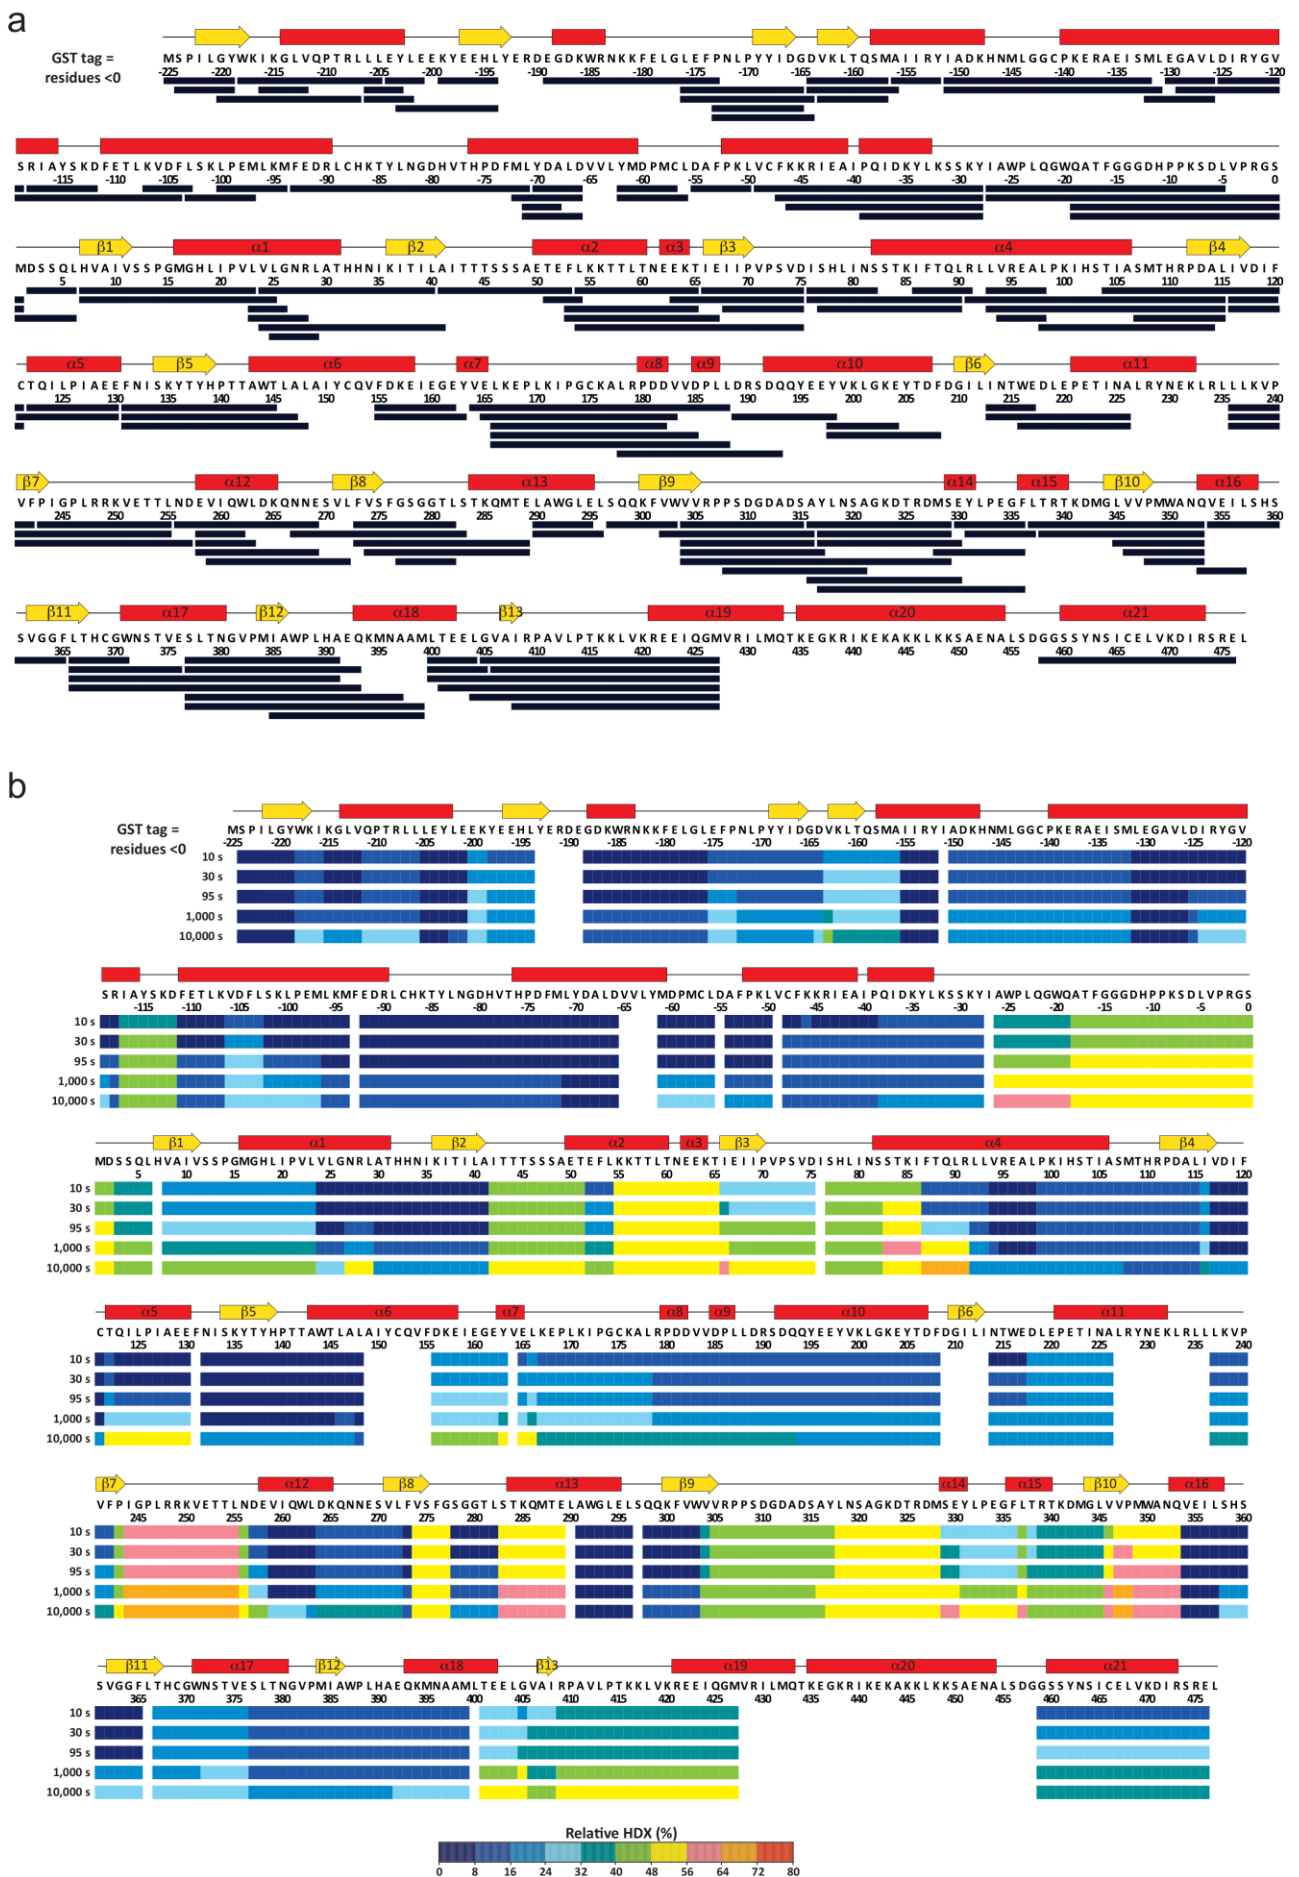

**Fig. S8. HDX-MS of NbUGT72AY1. a** NbUGT72AY1 peptides (peptide coverage map) analysed by HDX-MS. Each black bar represents a peptide that was evaluated for D-incorporation. Amino acids with numbers <math><0</math> are part of the GST tag. **b** HDX of apo-NbUGT72AY1. The predicted secondary structure is indicated above the amino acid sequences (red,  $\alpha$ -helix; yellow,  $\beta$ -strand). Relative deuterium uptake of NbUGT72AY1 after different time intervals. D-incorporation NbUGT72AY1 colored in rainbow from blue (0 %) to red (100% D-incorporation).

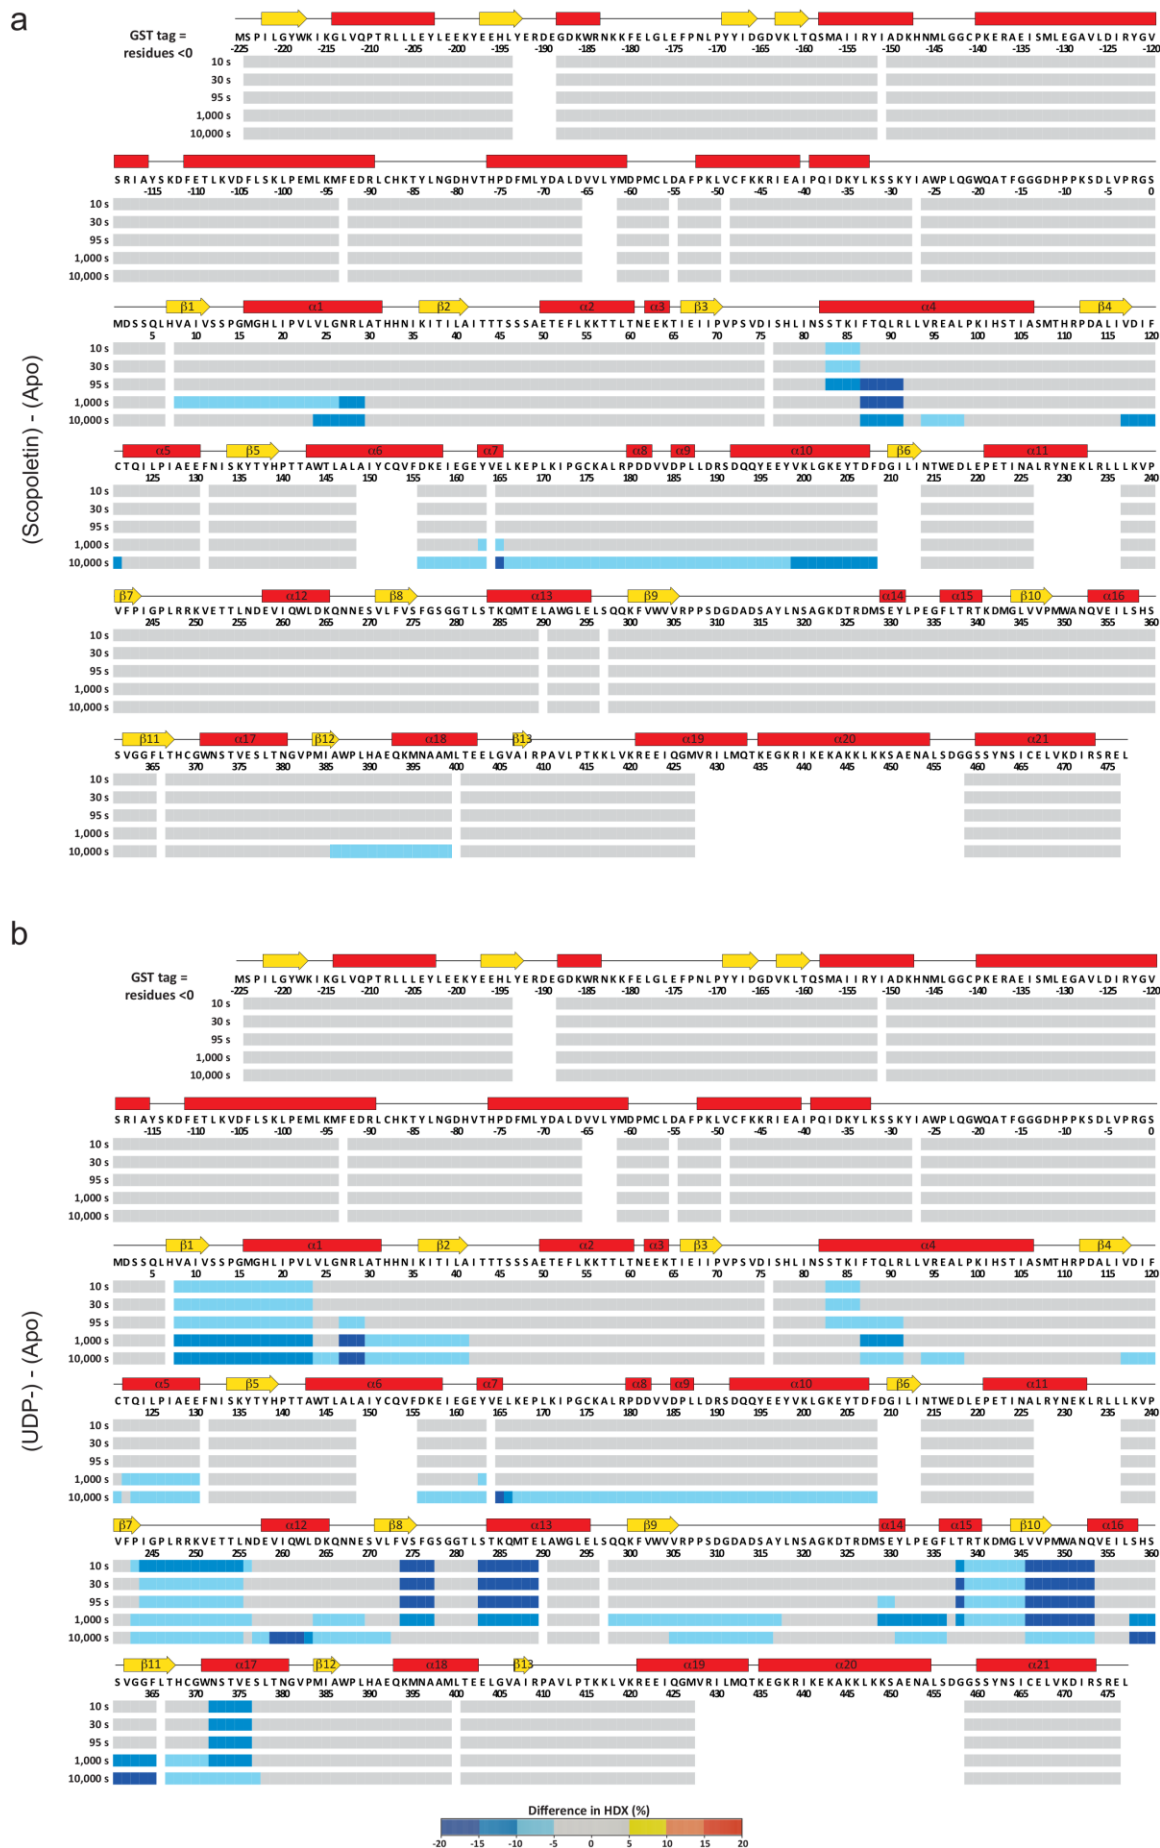

**Fig. S9. Conformational changes of NbUGT72AY1 related to substrate binding.** **a** Differences in deuterium uptake between scopoletin-bound and apo-NbUGT72AY1. **b** Differences in deuterium uptake between UDP-bound and apo-NbUGT72AY1. Differences are displayed on the amino acid sequence of the protein. The predicted secondary structure is indicated above (red,  $\alpha$ -helix; yellow,  $\beta$ -strand). Blue boxes show regions with less HDX in the presence of scopoletin or UDP. Regions with increased HDX in the presence of scopoletin or UDP were not observed.

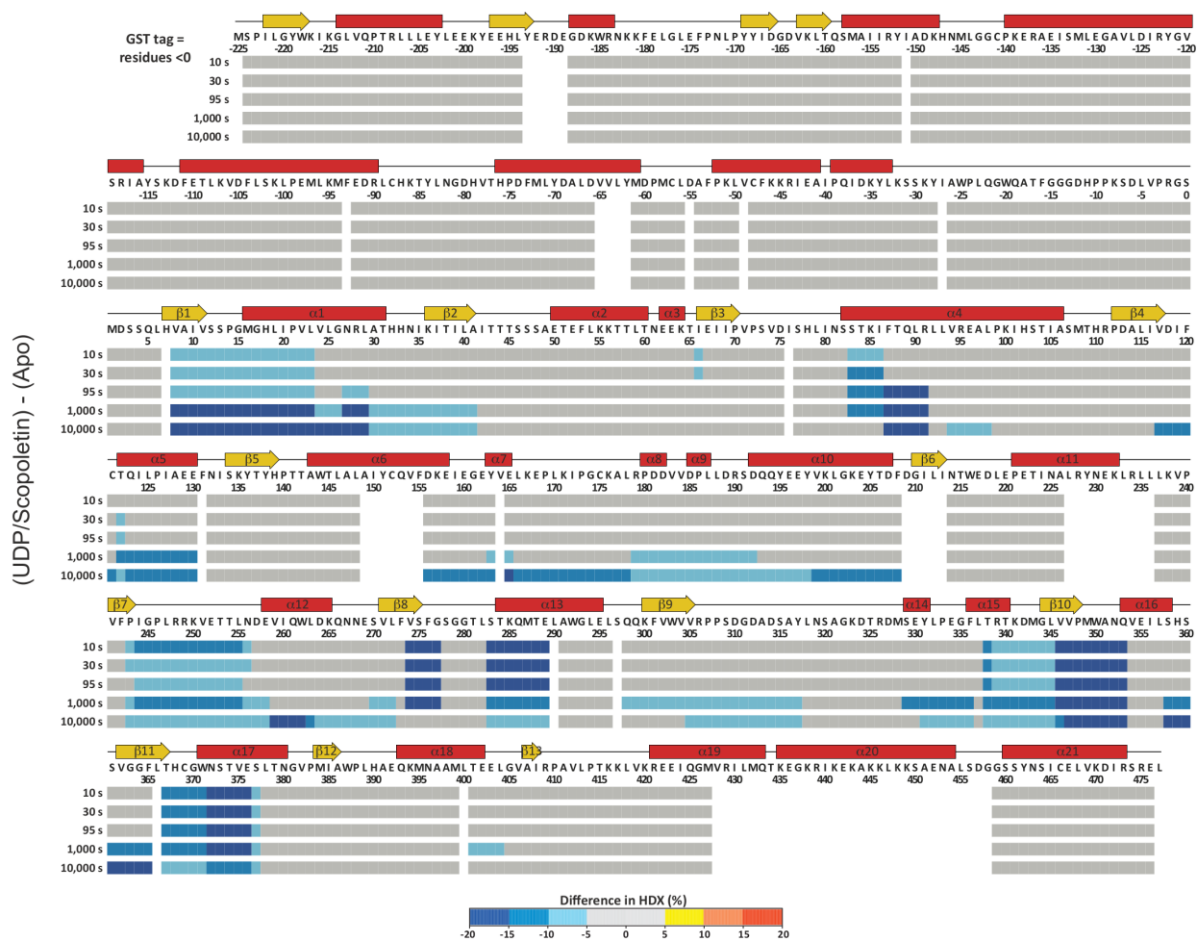

**Fig. S10. Conformational changes of NbUGT72AY1 related to scopoletin/UDP binding.** Difference in deuterium uptake between scopoletin-/UDP-bound and apo-NbUGT72AY1. Differences are displayed on the amino acid sequence of the protein. The predicted secondary structure is indicated above (red,  $\alpha$ -helix; yellow,  $\beta$ -strand). Blue boxes show regions with less HDX in the presence of scopoletin or UDP. Regions with increased HDX in the presence of scopoletin/UDP were not observed.

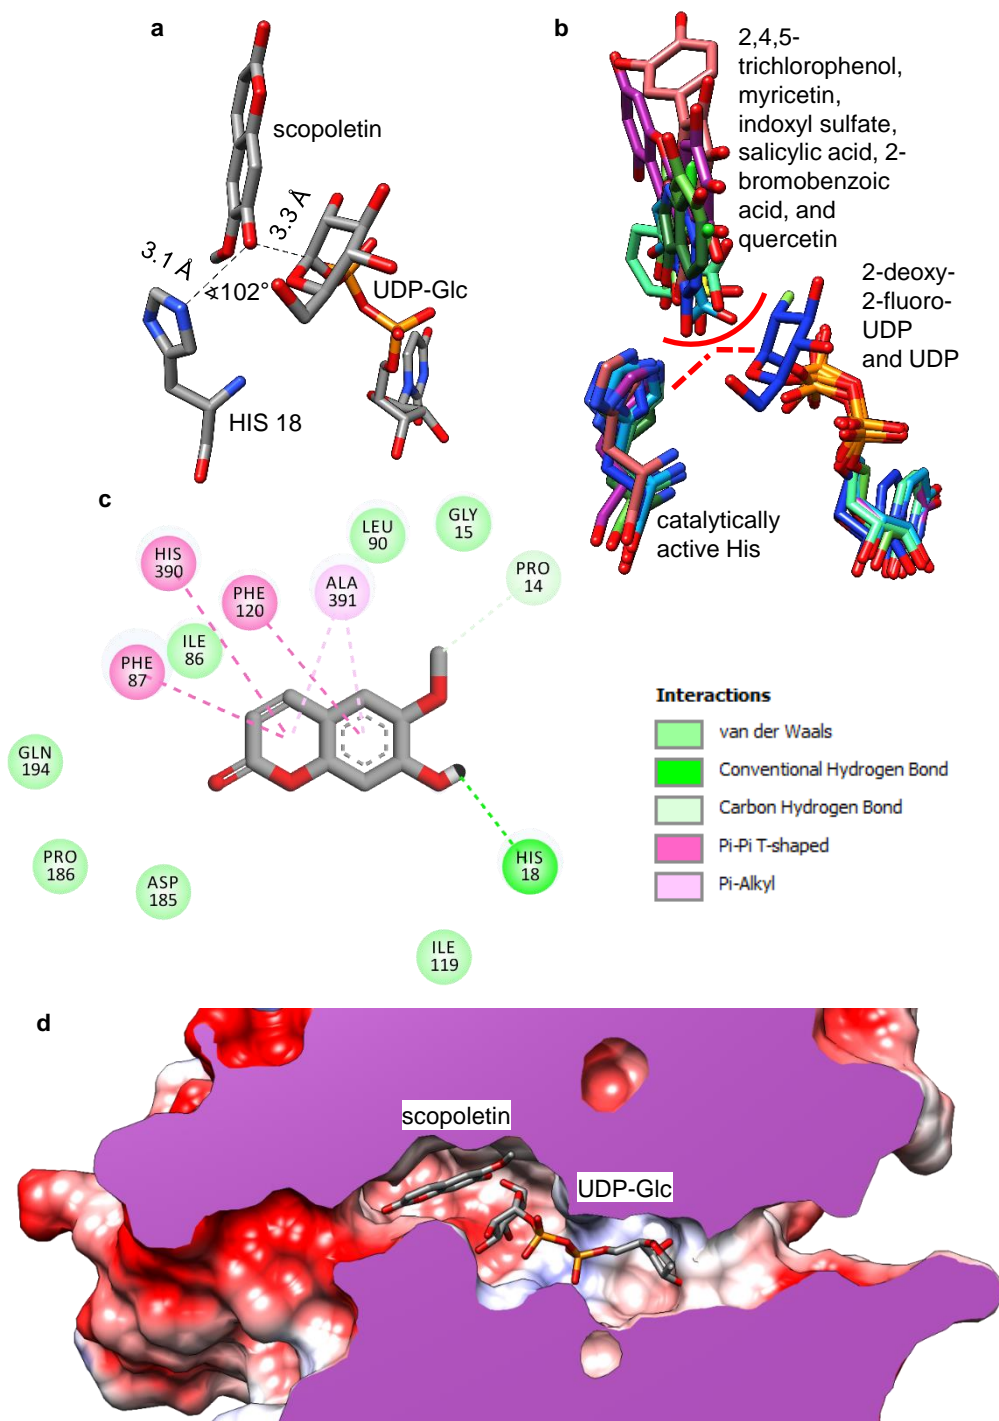

**Fig S11. Scopoletin docking in NbUGT72AY1.** **a** Ligand docking was performed with the Autodock/Vina tool (<http://vina.scripps.edu/download.html>) implemented into UCSF Chimera 1.15 (<https://www.cgl.ucsf.edu/chimera/download.html>) using default values. Structure 2VCE was used as template for positioning of scopoletin. **b** Superimposition of UGT structures showing their substrates/substrate analogs and the catalytically active His. The following 3D protein structures were used; 2VCE (2-deoxy-2-fluoro-UDP and 2,4,5-trichlorophenol), 3HBF (myricetin and UDP), 5NLM (indoxyl sulfate), 5U6M (salicylic acid and UDP), 5V2K (2-bromobenzoic acid and UDP), 6IJJ (quercetin), and 2C9Z (quercetin and UDP). Please note that the imidazole ring of the catalytically active His is rotated by 50° in structures where glucose or a glucose analog is missing in the complex (2VCE in comparison to the other structures). Since the 3D model of NbUGT72AY1 was predicted based on 6JTD (complex with UDP-Glc), the imidazole ring of His shows the same orientation as in 2VCE. **c** Ligand-protein interactions (scopoletin in the catalytic center) predicted by Discovery Studio Visualizer v19.1.0.18287 (<https://discover.3ds.com/discovery-studiovisualizer-Download>). **d** Substrate tunnel in the NbUGT72AY1 3D structure. Electrostatic surface potentials are colored red and blue for negative and positive charges, respectively, and white color represents neutral residues.

a

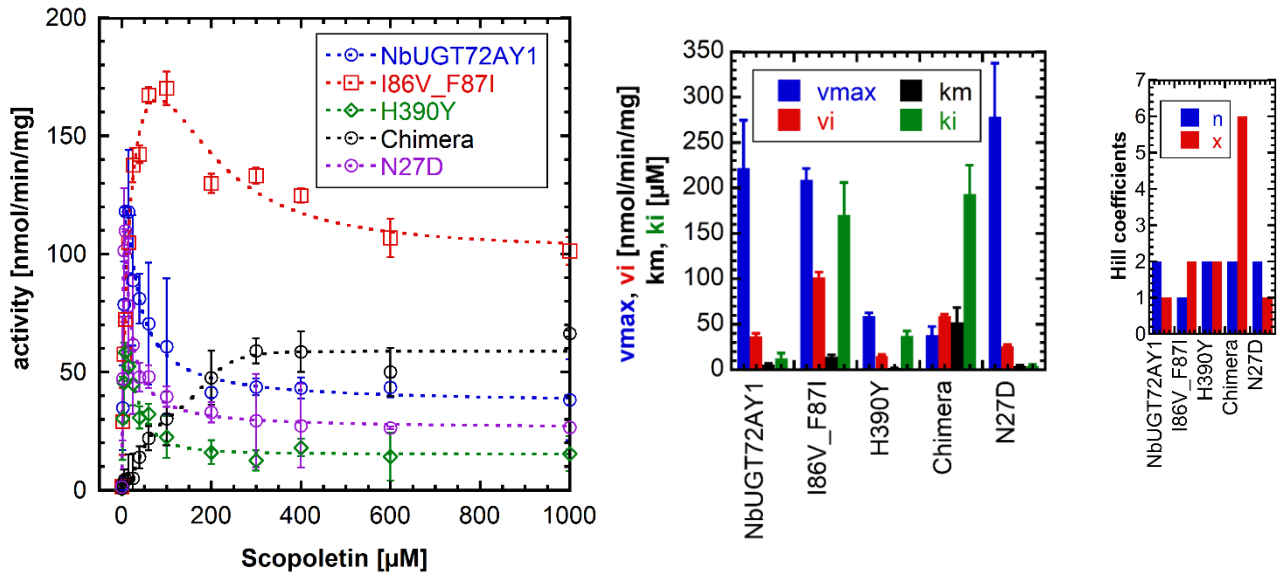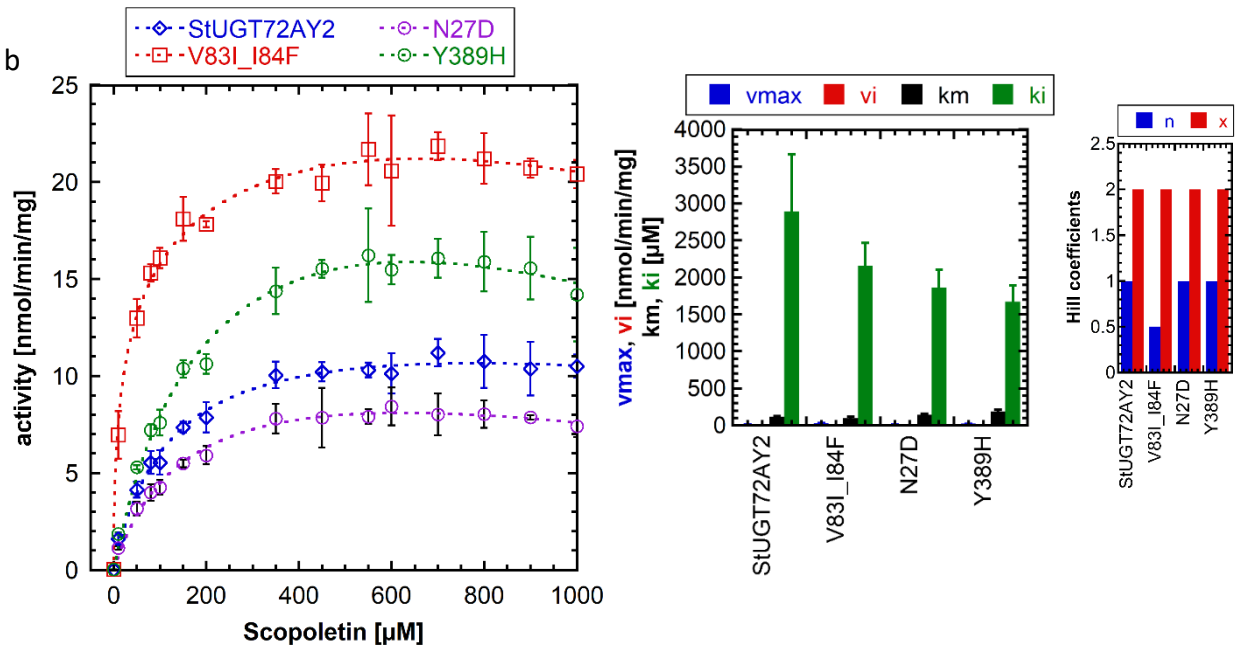

**Fig. S12.** Kinetic parameters (based on LC-MS data) of NbUGT72AY1, StUGT72AY2, and mutant enzymes using scooletin as substrates. **a** NbUGT72AY1 and its mutants were used to glucosylate scooletin. **b** StUGT72AY2 and its mutants were used to glucosylate scooletin

# NbUGT72AY1

<https://www.ebi.ac.uk/thornton-srv/databases/pdbsum/Generate.html>

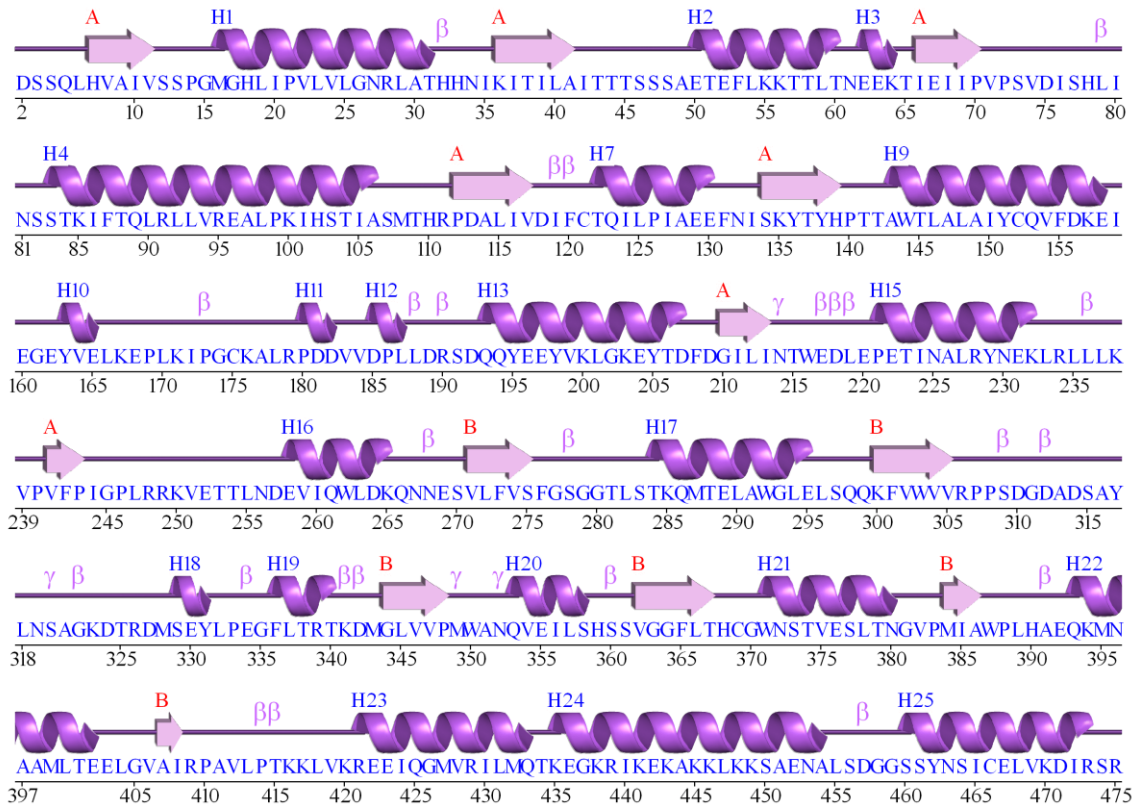

# StUGT72AY2

<https://www.ebi.ac.uk/thornton-srv/databases/pdbsum/Generate.html>

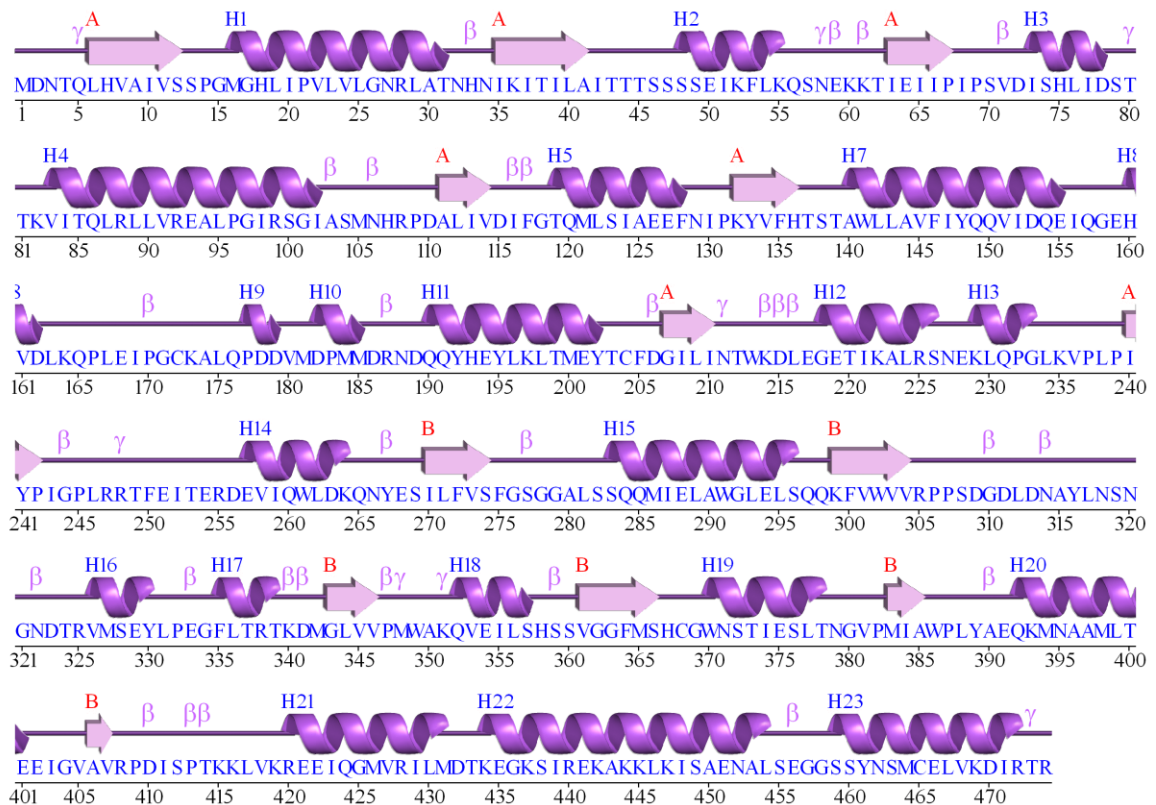

**Fig. S13. Predicted secondary structures of NbUGT72AY1 and StUGT72AY2.** The wiring diagram is a schematic diagram showing the protein's secondary structure elements ( $\alpha$ -helices and  $\beta$ -sheets) together with various structural motifs such as beta- and gamma-turns, and beta-hairpins. Helices are labelled H1, H2, etc while strands are labelled A, B, C, etc according to the beta sheet to which they belong.



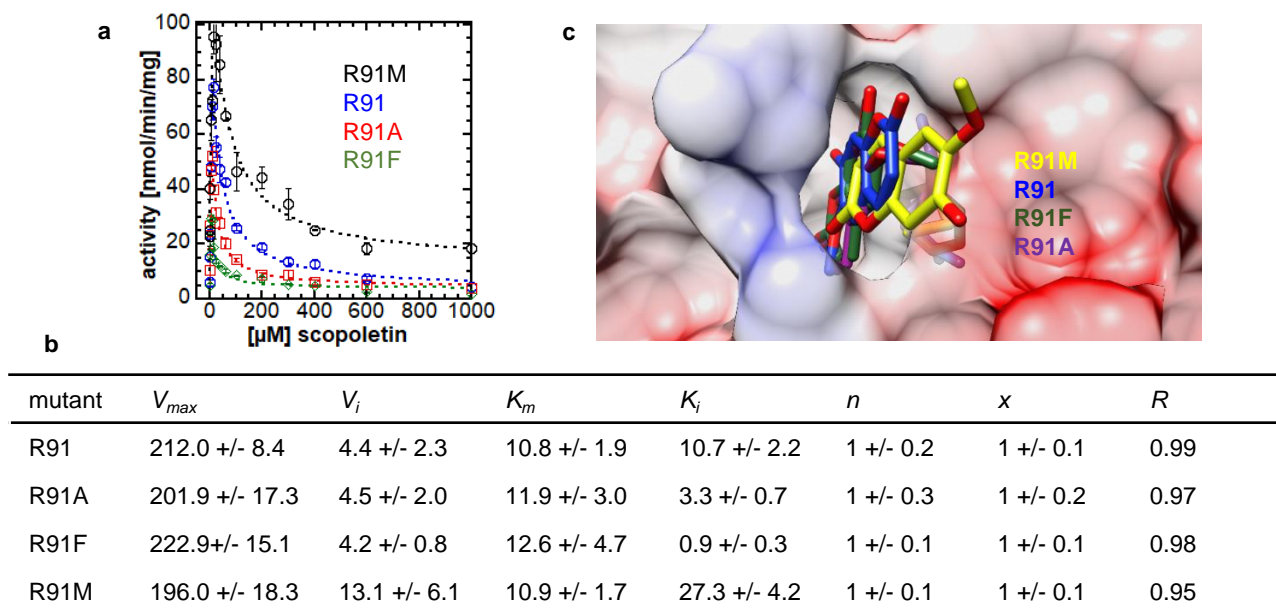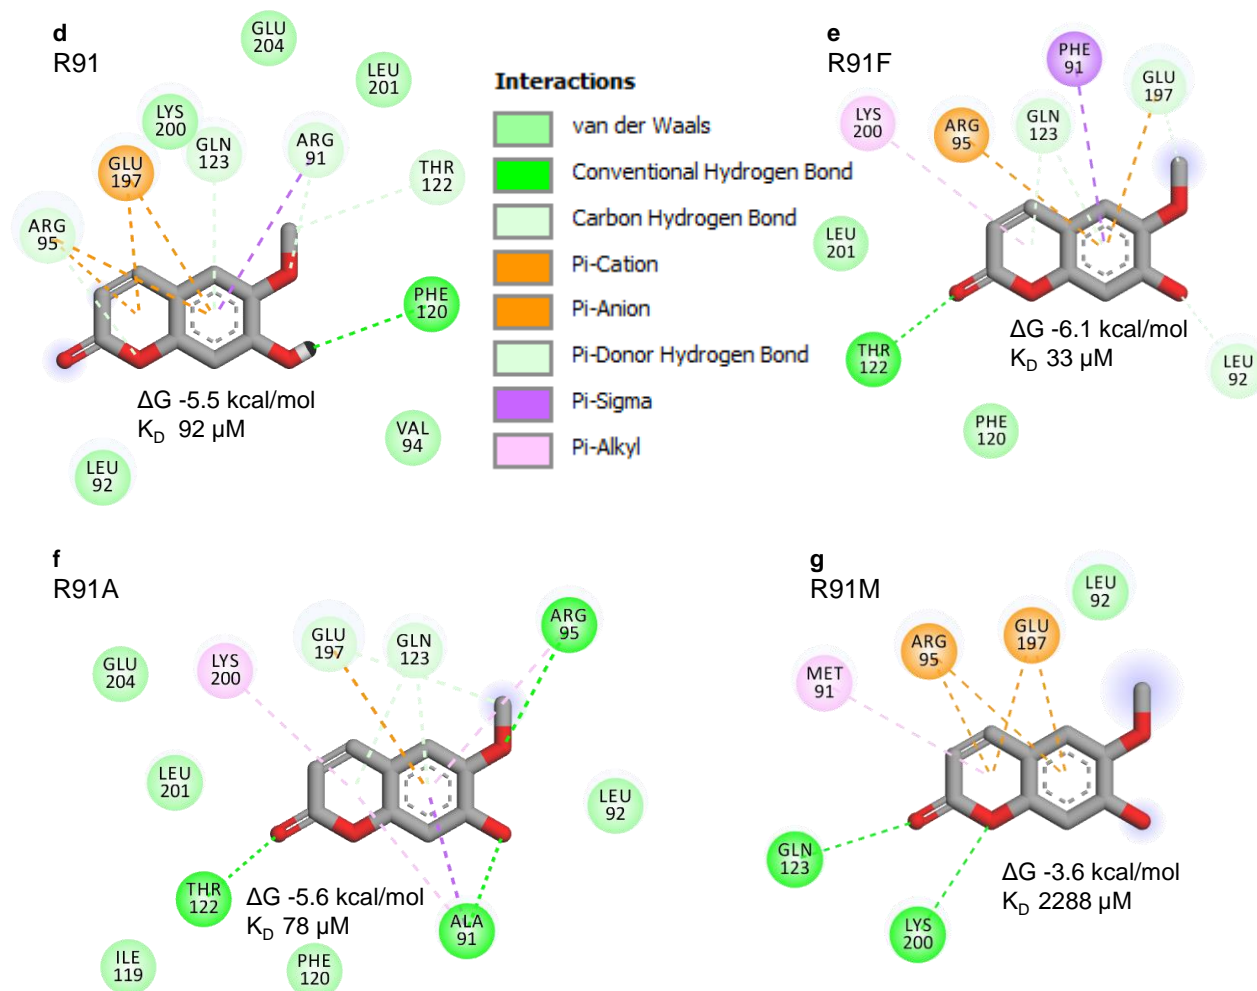

**Fig S14. Mutational analysis of R91 demonstrates its involvement in substrate inhibition of NbUGT72AY1.** **a** Two dimensional plots of acceptor substrate concentration versus reaction rate for the wild type enzyme NbUGT72AY1 (R91) and mutants R91A, R91F and R91M. **b** Kinetics of mutants towards scopoletin. **c** Docking of scopoletin into the putative allosteric site of the mutants was performed with the Autodock/Vina tool (<http://vina.scripps.edu/download.html>) implemented into UCSF Chimera 1.15 (<https://www.cgl.ucsf.edu/chimera/download.html>) using default values. **d** *In silico* calculated binding energies  $\Delta G$  (Autodock/Vina) were used to calculate equilibrium constants  $K_D$ . The models were visualized by Discovery Studio Visualizer v19.1.0.18287 (<https://discover.3ds.com/discovery-studiovisualizer-Download>); wild type R91. **e** Mutant R91F. **f** Mutant R91A. **g** Mutant R91M.

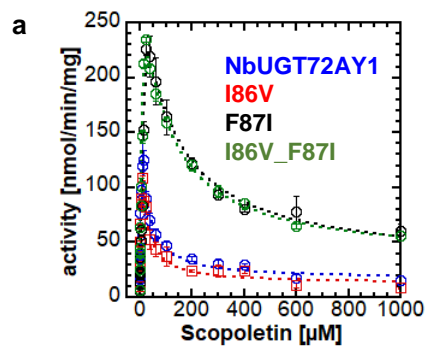

**b**

| mutant     | $V_{max}$      | $V_i$        | $K_m$       | $K_i$        | $n$         | $x$         | $R$  |
|------------|----------------|--------------|-------------|--------------|-------------|-------------|------|
| NbUGT72AY1 | 298.2 +/- 8.4  | 16.3 +/- 4.0 | 8.1 +/- 1   | 11.6 +/- 1.5 | 1 +/- 0.1   | 1 +/- 0.1   | 0.98 |
| I86V       | 318.9 +/- 10.0 | 11.6 +/- 3.3 | 9.8 +/- 1.5 | 8.6 +/- 1.1  | 1 +/- 0.1   | 1 +/- 0.2   | 0.98 |
| F87I       | 322 +/- 7.6    | 29.8 +/- 0.8 | 13 +/- 4.7  | 97.4 +/- 0.3 | 1.5 +/- 0.1 | 1.1 +/- 0.1 | 0.98 |
| I86V_F87I  | 321 +/- 5.8    | 32 +/- 6.1   | 8 +/- 1.7   | 86 +/- 4.2   | 1.3 +/- 0.1 | 1 +/- 0.1   | 0.98 |

**Fig. S15. Mutational analysis to demonstrate the involvement of F87I in substrate inhibition of NbUGT72AY1.** **a** Two dimensional plots of acceptor substrate concentration versus reaction rate for the wild type enzyme NbUGT72AY1 and mutants I86V, F87I, and the double mutant I86V\_F87I. **b** Kinetics of mutants towards scooletin.

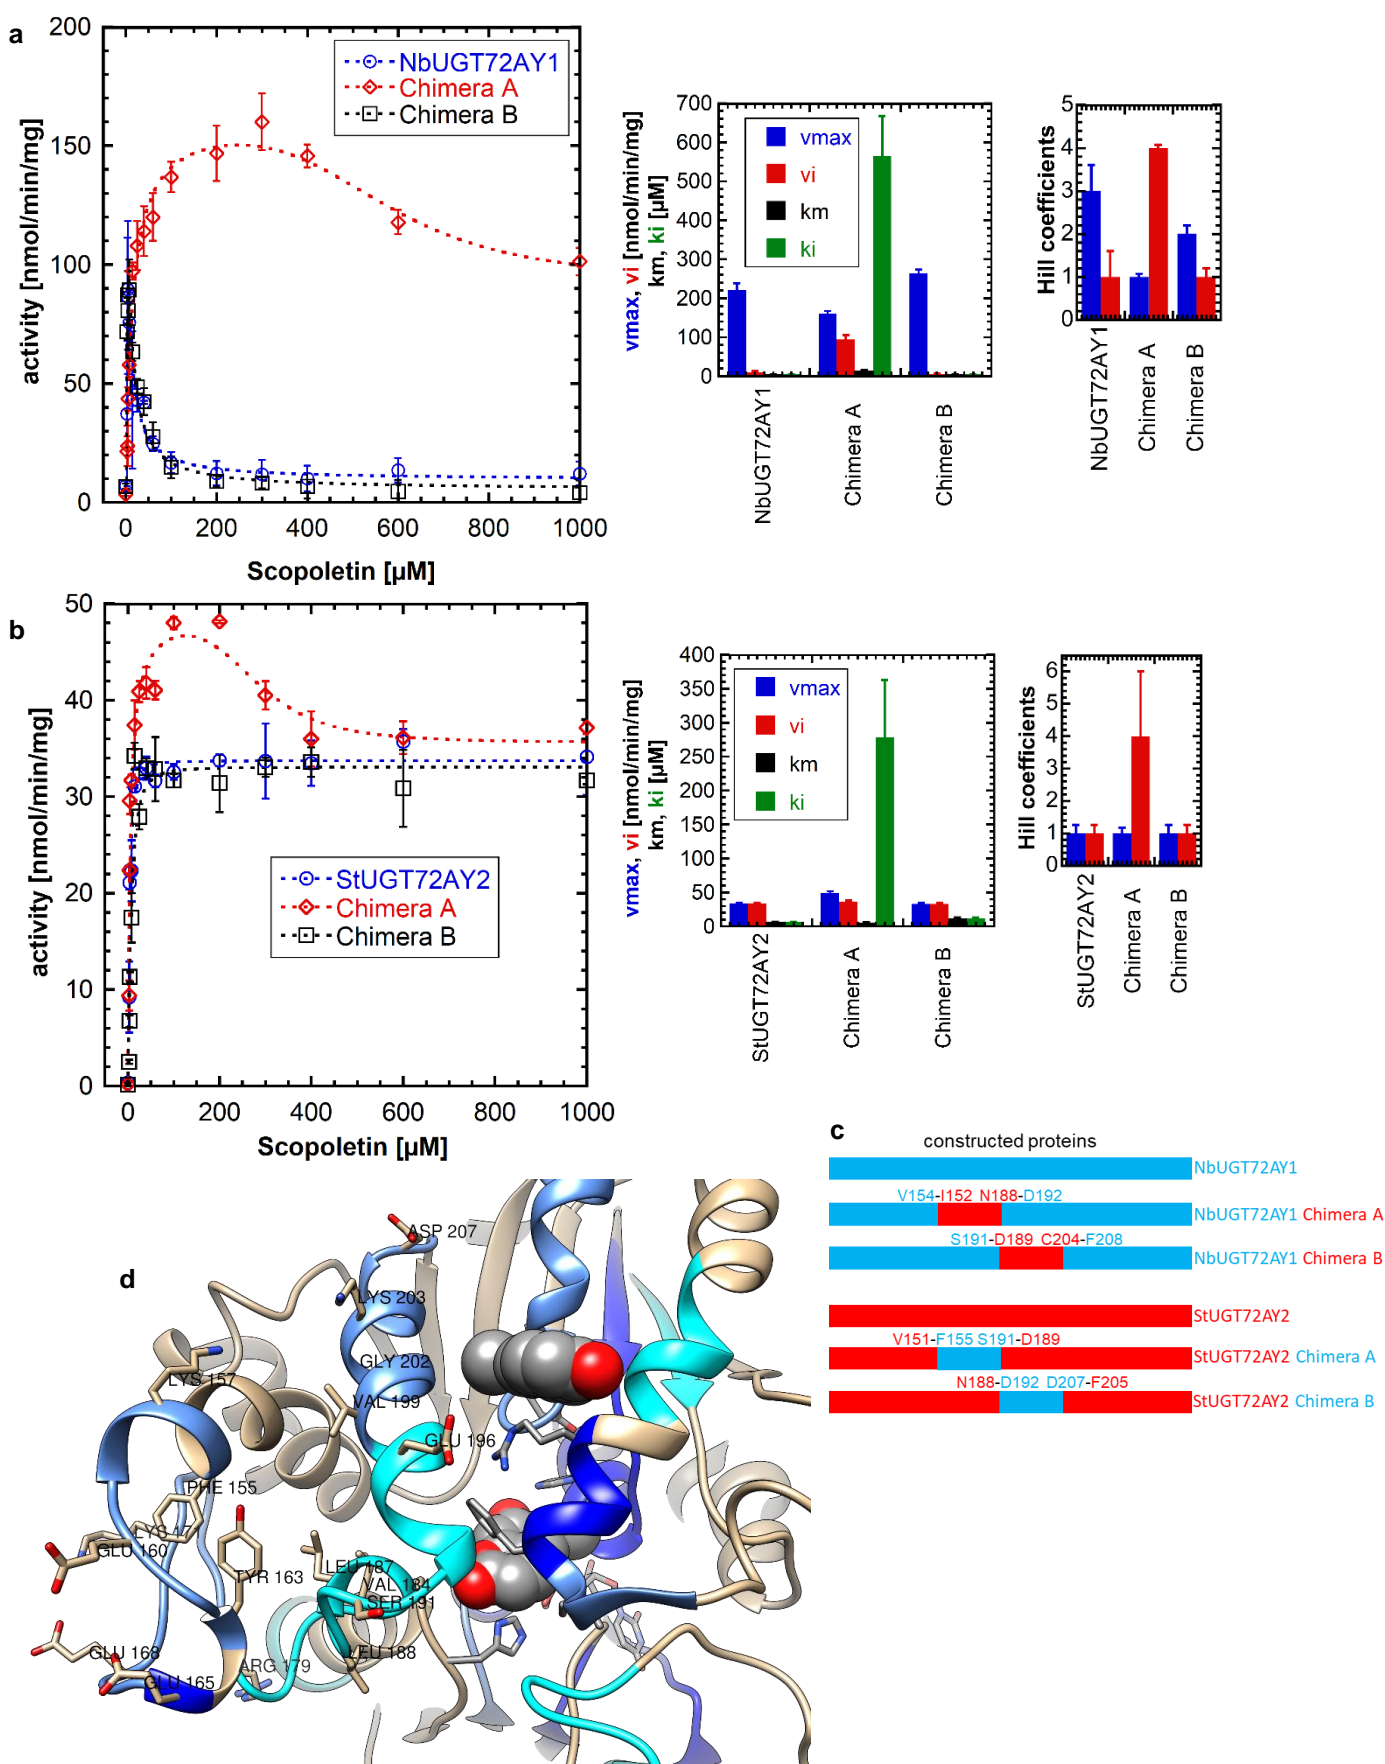

**Fig. S16.** Kinetic parameters of NbUGT72AY1, StUGT72AY2, and mutant enzymes to identify key amino acids in the chimera sequence responsible for substrate inhibition. Scopletin was used as substrate. **a** NbUGT72AY1 and its mutants were used to glucosylate scopletin. **b** StUGT72AY2 and its mutants were used to glucosylate scopletin. **c** Schemes of the generated mutants. Chimeras A and B contain only part of the original sequence of the chimera mutants. The reciprocal enzymes (StUGT72AY2 versions) were also generated. **d** Predicted NbUGT72AY1 protein model showing the amino acids that differ in the chimeric sequence in NbUGT72AY1 and StUGT72AY2.

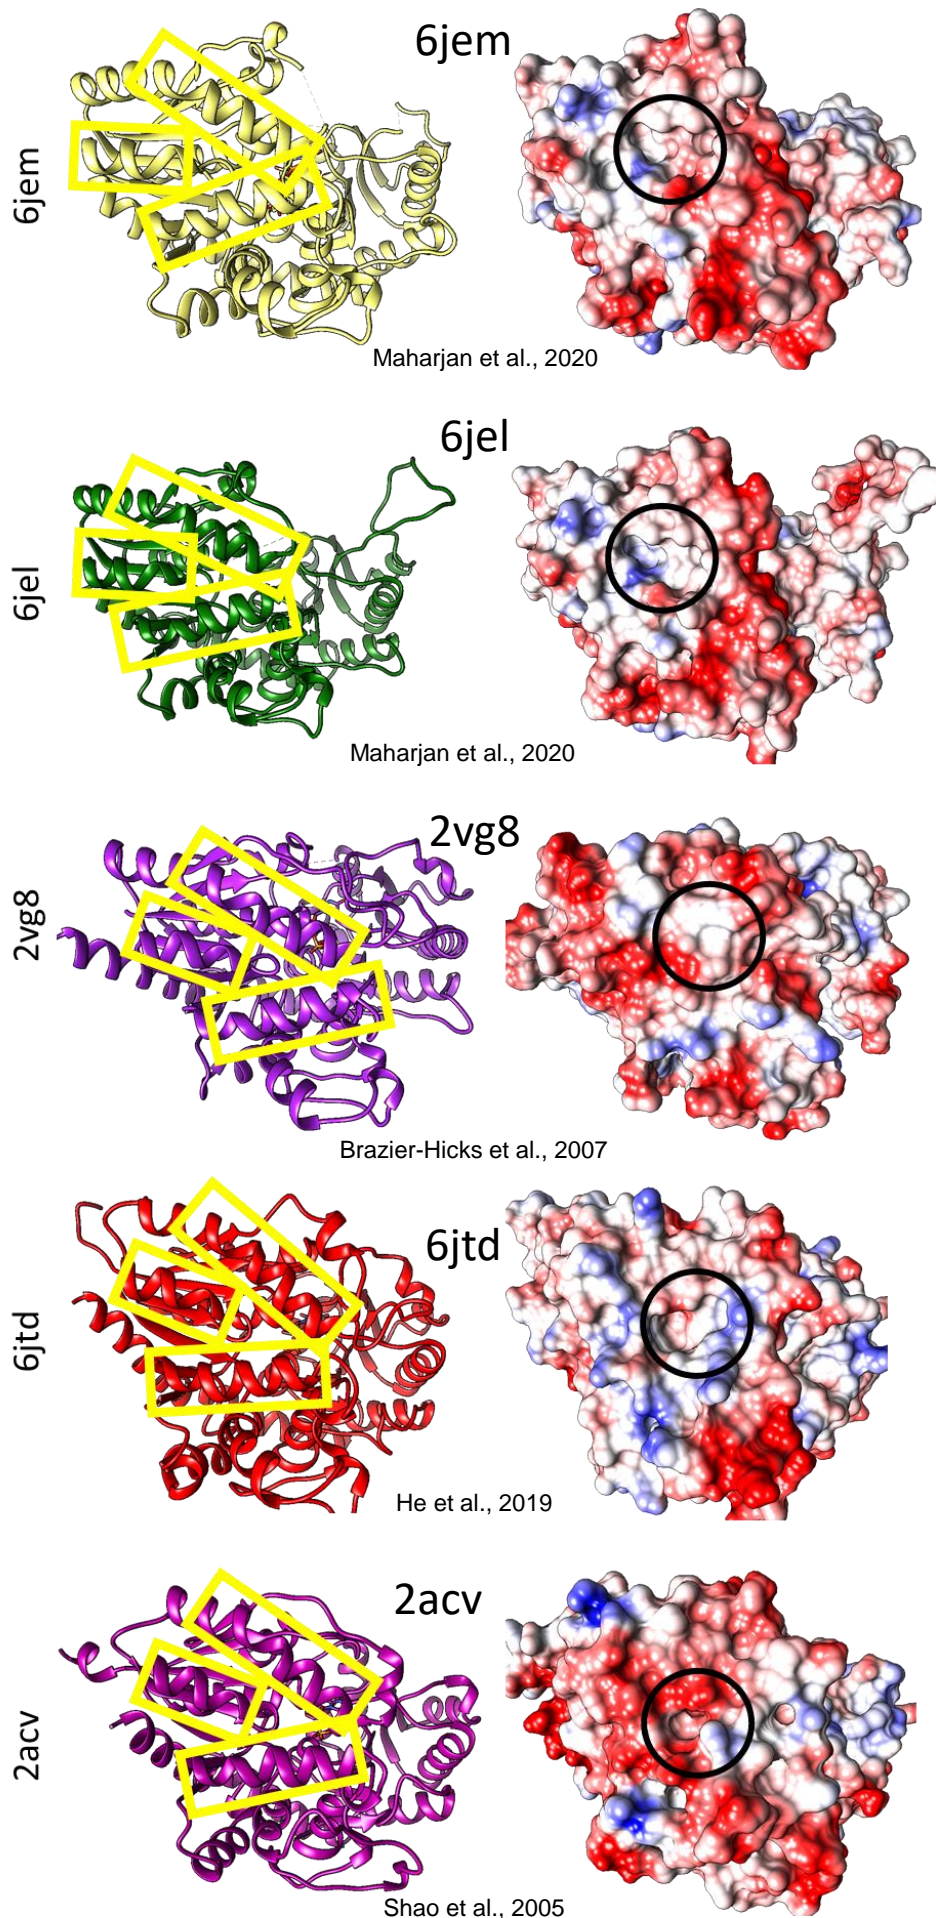

**Fig. S17. Putative allosteric site in GT-B-folded UGTs.** Structures were uploaded from [www.rcsb.org](http://www.rcsb.org). A black circle indicates the putative allosteric site, which is established by three  $\alpha$ -helices (in yellow boxes).

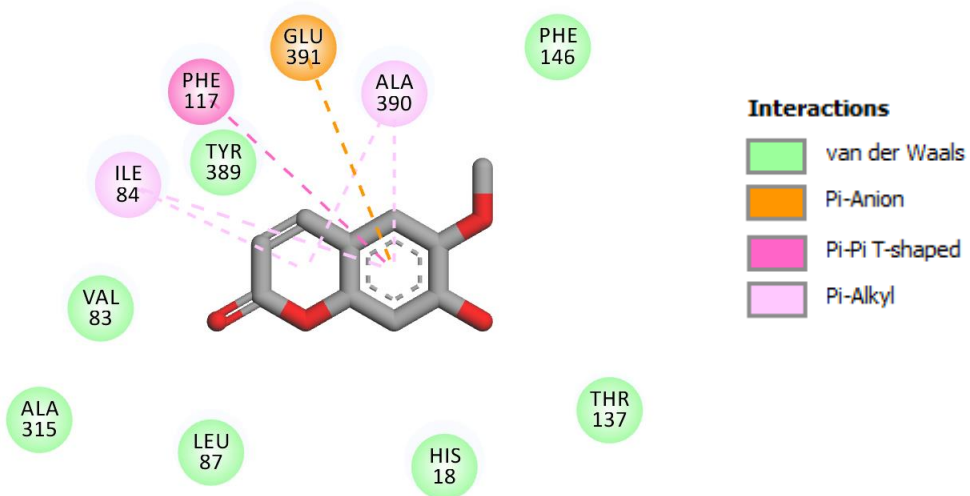

**Fig. S18.** Docking of scopoletin into the active site of StUGT72AY2. Docking was performed with the Autodock/Vina tool (<http://vina.scripps.edu/download.html>) implemented into UCSF Chimera 1.15 (<https://www.cgl.ucsf.edu/chimera/download.html>) using default values.

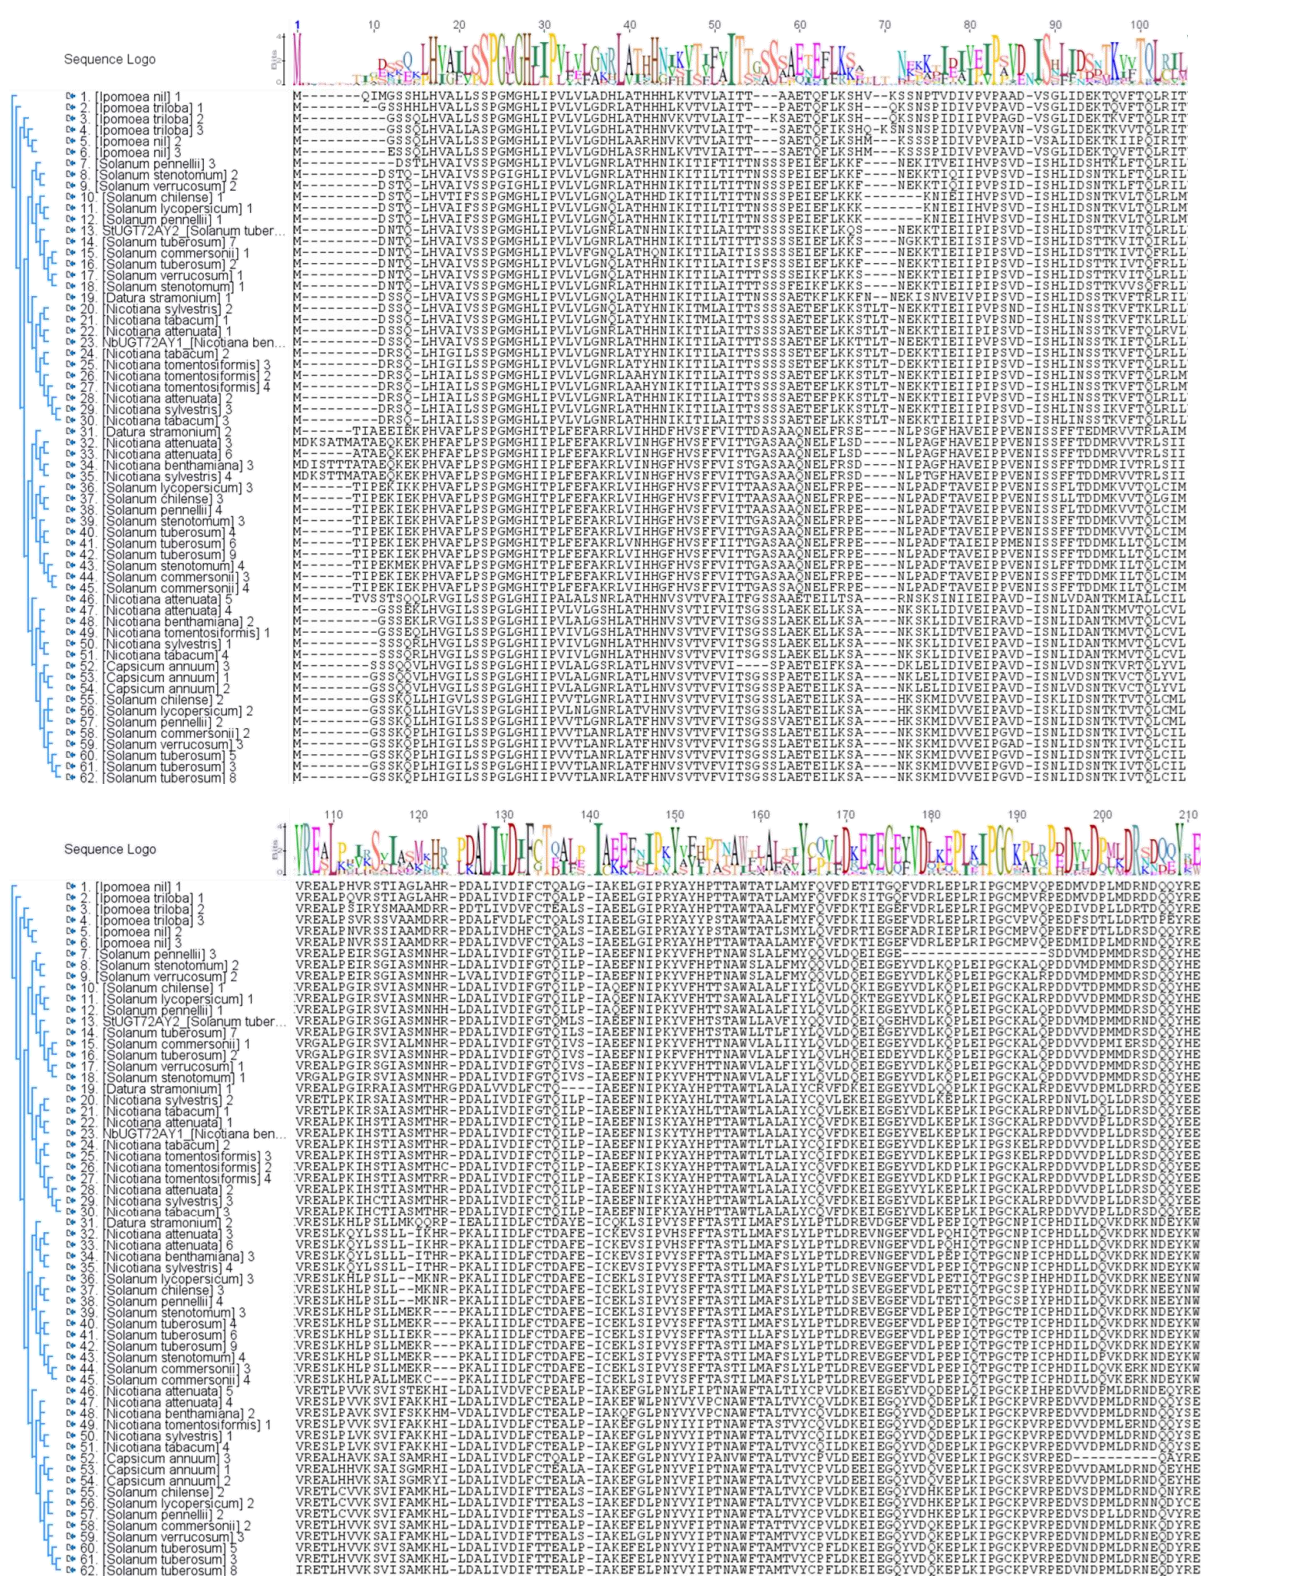

**Fig. S19. Phylogenetic analysis of the closed homologues of NbUGT72AY1.** The tree shows the protein sequences most similar to NbUGT72AY1 extracted from GenBank ([www.ncbi.nlm.nih.gov/genbank/](http://www.ncbi.nlm.nih.gov/genbank/)).

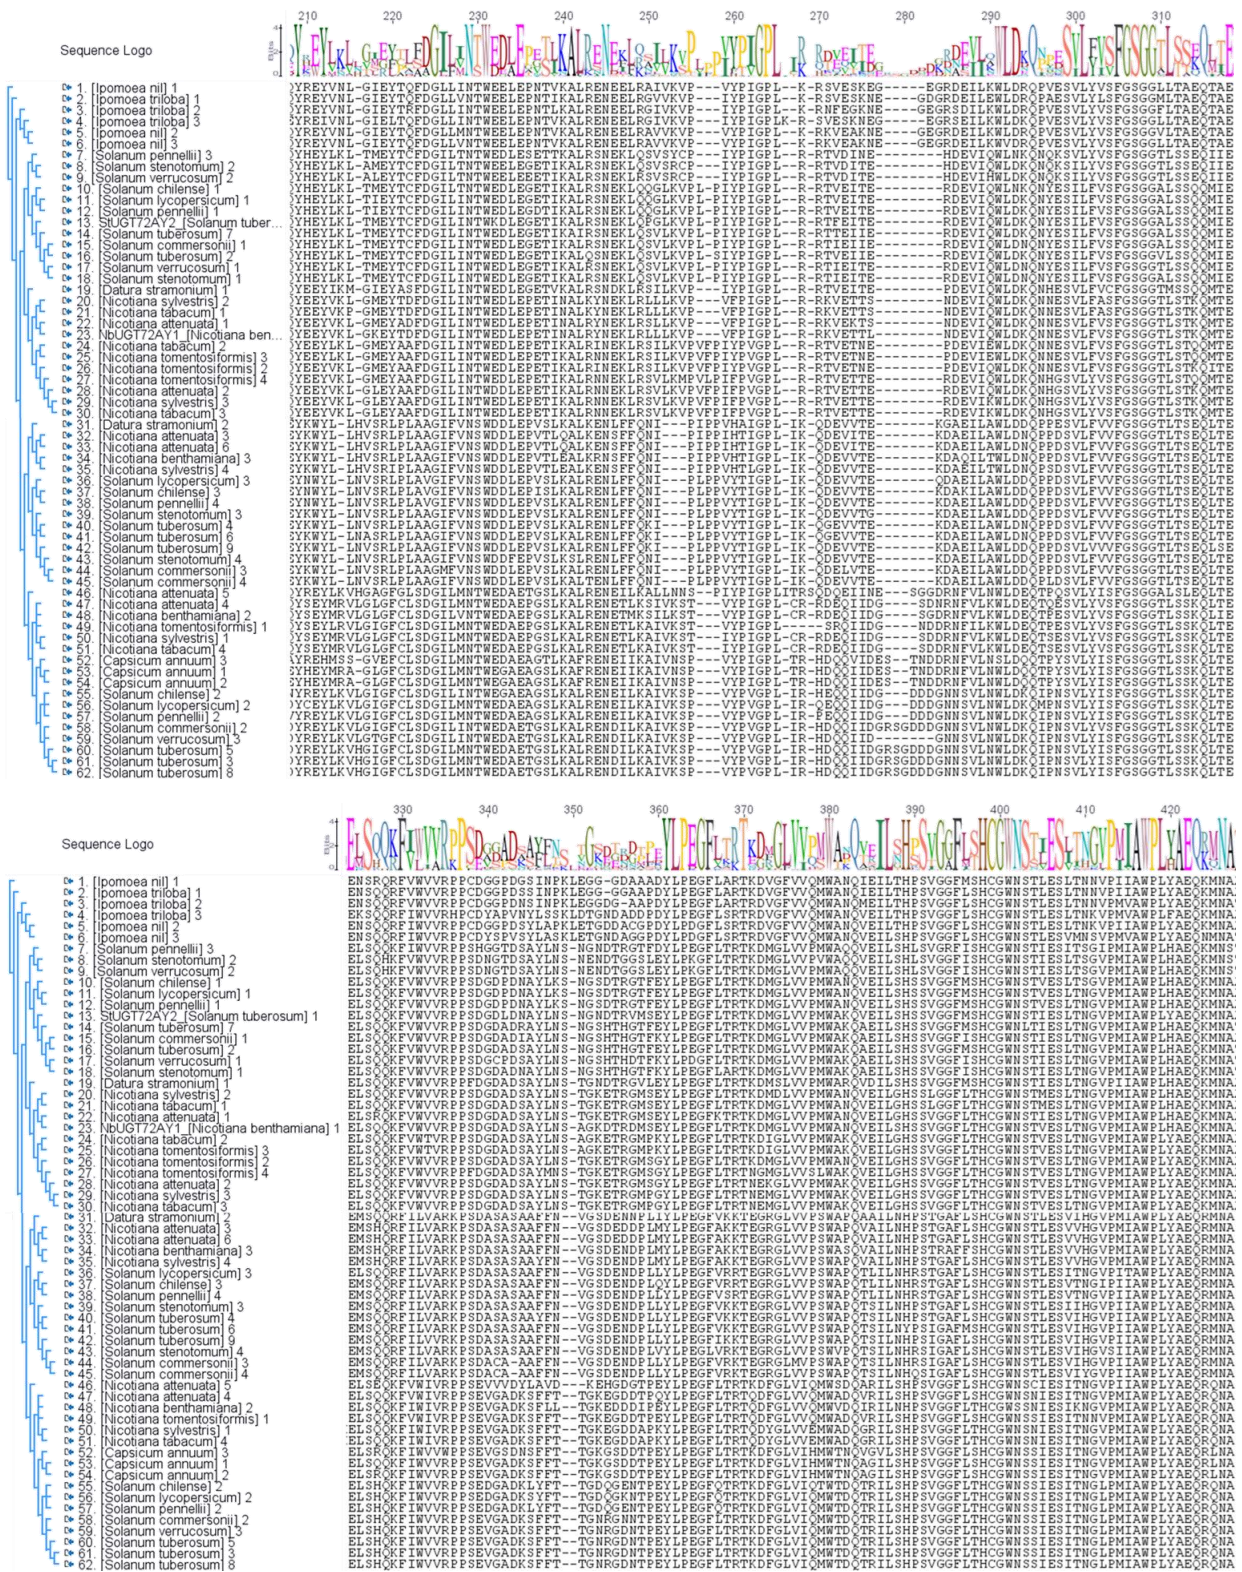

Fig. S19. Phylogenetic analysis of the closed homologues of NbUGT72AY1. The tree shows the protein sequences most similar to NbUGT72AY1 extracted from GenBank ([www.ncbi.nlm.nih.gov/genbank/](http://www.ncbi.nlm.nih.gov/genbank/)).

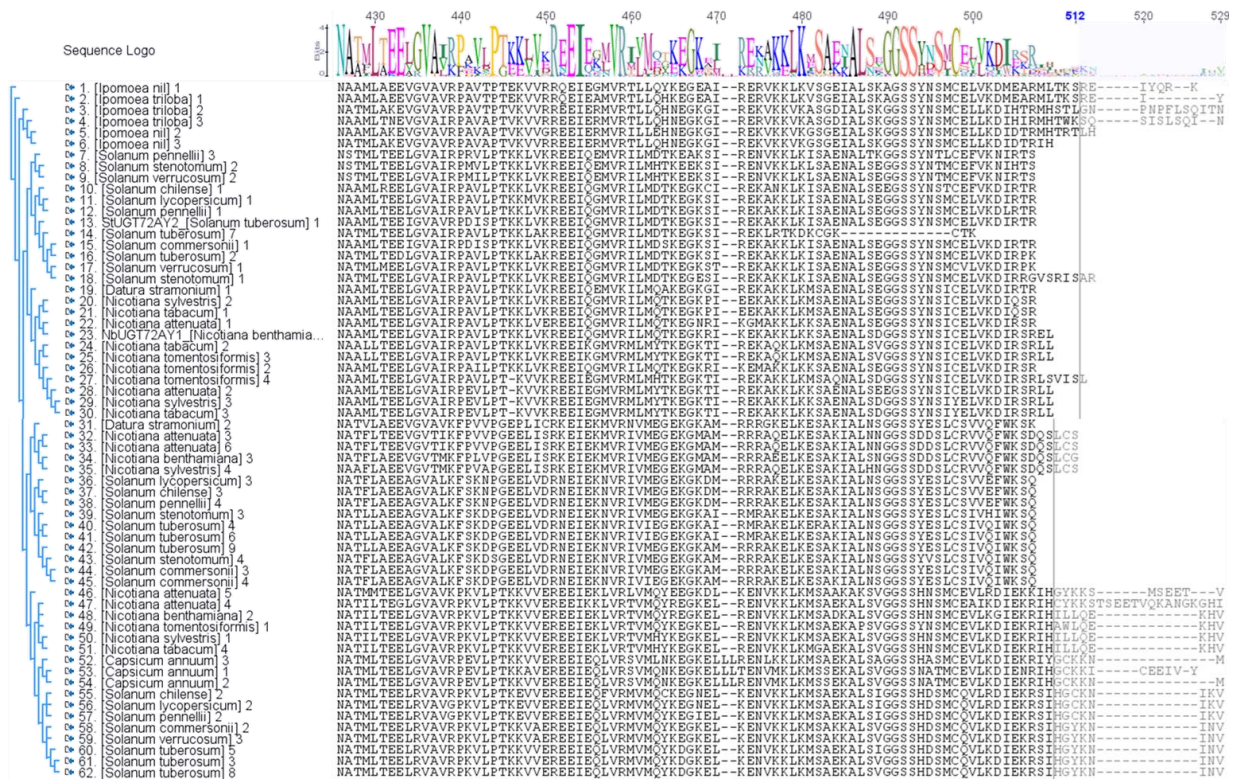

**Fig. S19. Phylogenetic analysis of the closed homologues of NbUGT72AY1.** The tree shows the protein sequences most similar to NbUGT72AY1 extracted from GenBank ([www.ncbi.nlm.nih.gov/genbank](http://www.ncbi.nlm.nih.gov/genbank)).



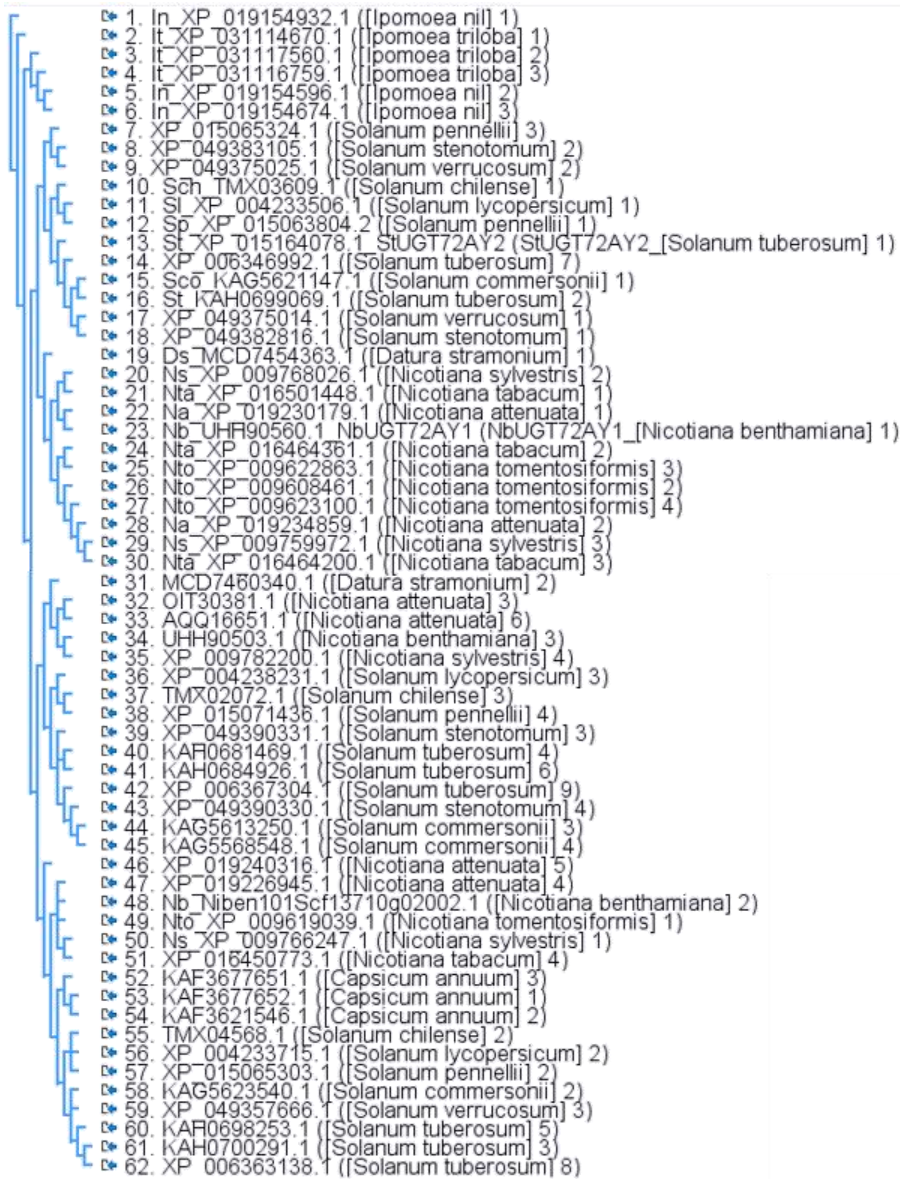

**Fig. S20. Phylogenetic analysis of the closed homologues of NbUGT72AY1.** The tree shows the accession numbers of the protein sequences most similar to NbUGT72AY1 extracted from GenBank ([www.ncbi.nlm.nih.gov/genbank/](http://www.ncbi.nlm.nih.gov/genbank/)).

| Selected                 | Gene ID                       | Cluster                       | Most recent duplication | Similarity Score | Highest expressed tissue | Tissues specificity ▲ | Sequence description                         | EC                                                   |
|--------------------------|-------------------------------|-------------------------------|-------------------------|------------------|--------------------------|-----------------------|----------------------------------------------|------------------------------------------------------|
| <input type="checkbox"/> | <a href="#">NIATv7_g08662</a> | <a href="#">cluster000616</a> | shared among Solanaceae | 0.9907           | leaf treated             | 0.9787                | feruloyl ortho-hydroxylase 1-like            |                                                      |
| <input type="checkbox"/> | <a href="#">NIATv7_g21047</a> | <a href="#">cluster013006</a> | shared among Nicotiana  | 0.9828           | leaf treated             | 0.9393                | fruit-specific -like                         |                                                      |
| <input type="checkbox"/> | <a href="#">NIATv7_g16562</a> | <a href="#">cluster004316</a> | shared among Solanaceae | 0.9844           | leaf treated             | 0.872                 | phosphoribulokinase, chloroplastic           | <a href="#">2.7.1.48</a><br><a href="#">2.7.1.19</a> |
| <input type="checkbox"/> | <a href="#">NIATv7_g30724</a> | <a href="#">cluster001174</a> | shared among Nicotiana  | 0.9566           | leaf treated             | 0.8153                | alpha-dioxygenase 1-like                     | <a href="#">1.11.1.7</a>                             |
| <input type="checkbox"/> | <a href="#">NIATv7_g16426</a> | <a href="#">cluster001640</a> | shared among Nicotiana  | 1                | leaf treated             | 0.7788                | anthocyanidin 3-O-glucosyltransferase 5-like |                                                      |

**Fig. S21. Co-expression analysis performed at [http://nahd.ice.mpg.de/NaDH/network/gene\\_gene](http://nahd.ice.mpg.de/NaDH/network/gene_gene).** The orthologue of NbUGT72AY1 from *N. attenuata* (XP\_019230179) was used to screen for co-expressed genes in a *N. attenuata* transcriptome database.

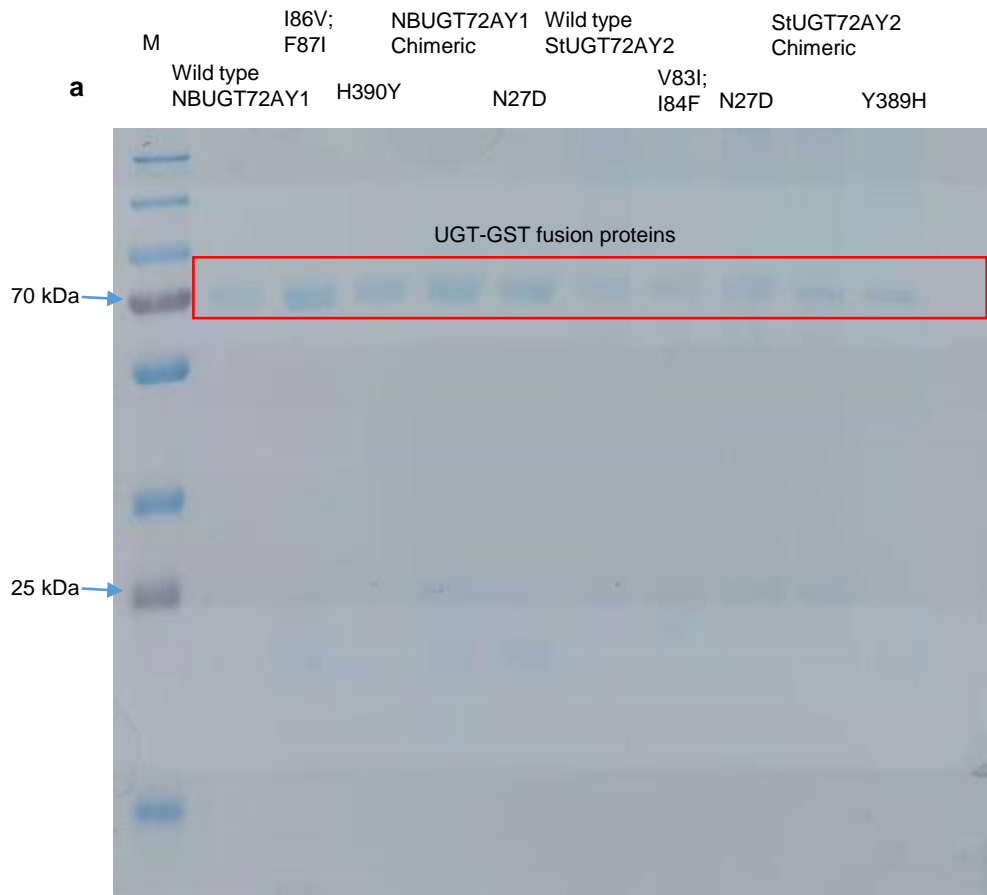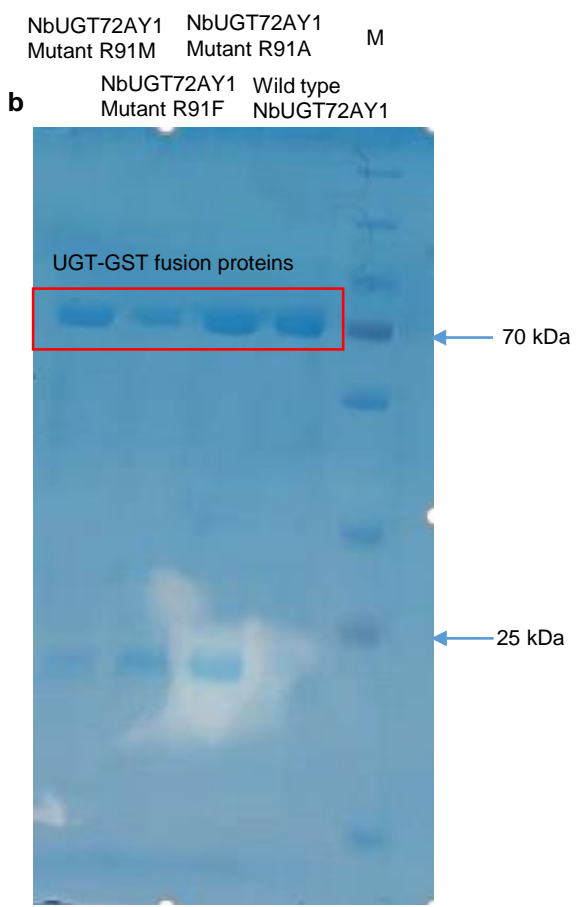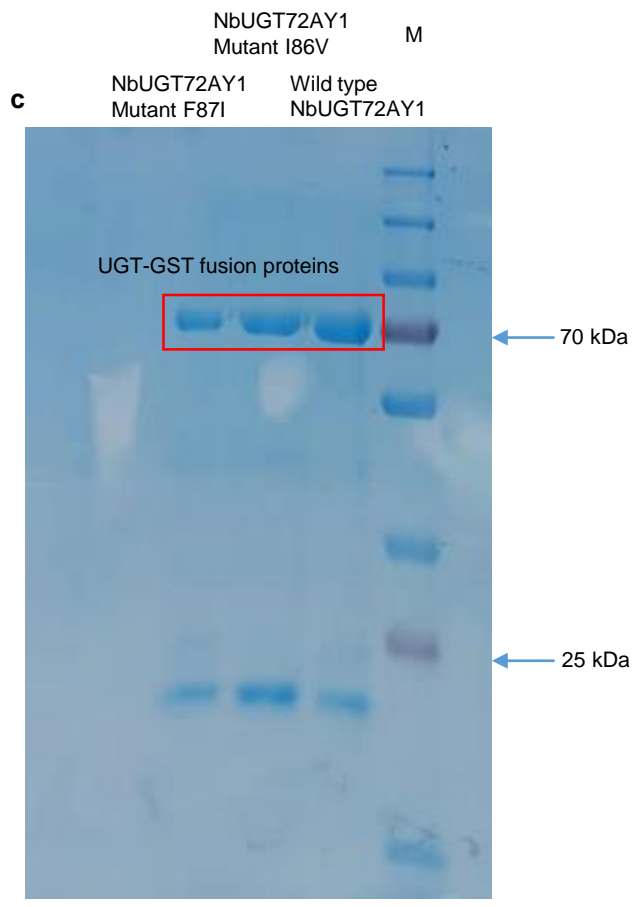

**Fig. S22. SDS-PAGE analysis of NbUGT72AY1, StUGT72AY2 and their mutants.** Gel was stained with Coomassie Blue. M: marker proteins (PageRuler Plus Prestained Protein Ladder marker). **a** Wild type NbUGT72AY1, NbUGT72AY1 Mutant I86V\_F87I, NbUGT72AY1 Mutant H390Y, NbUGT72AY1 Mutant chimeric, NbUGT72AY1 Mutant N27D, Wild type StUGT72AY2, StUGT72AY2 Mutant V83I\_I84F, StUGT72AY2 Mutant N27D, StUGT72AY2 Mutant chimeric, and StUGT72AY2 Mutant Y389H. **b** Wild type NbUGT72AY1, NbUGT72AY1 Mutant R91A, NbUGT72AY1 Mutant R91F, and NbUGT72AY1 Mutant R91M. **c** Wild type NbUGT72AY1, NbUGT72AY1 Mutant I86V, and NbUGT72AY1 Mutant F87I.

## References

- Brazier-Hicks, M., Offen, W.A., Gershater, M.C., Revett, T.J., Lim, E.K., Bowles, D.J., Davies, G.J., Edwards, R. (2007) Characterization and engineering of the bifunctional N- and O-glucosyltransferase involved in xenobiotic metabolism in plants. *Proc. Natl. Acad. Sci. U. S. A.* **104**, 20238-2043
- He, J.B., Zhao, P., Hu, Z.M., Liu, S., Kuang, Y., Zhang, M., Li, B., Yun, C.H., Qiao, X., Ye, M. (2019) Molecular and structural characterization of a promiscuous C-glycosyltransferase from *Trollius chinensis*. *Angew. Chem. Int. Ed. Engl.* **58**, 11513-11520
- Maharjan, R., Fukuda, Y., Shimomura, N., Nakayama, T., Okimoto, Y., Kawakami, K., Nakayama, T., Hamada, H., Inoue, T., Ozaki, S.I. (2020) An ambidextrous polyphenol glycosyltransferase PaGT2 from *Phytolacca americana*. *Biochemistry* **59**, 2551-2561
- McGuffin, L.J., Adiyaman, R.; Maghrabi, A.H.A., Shuid, A.N.; Brackenridge, D.A., Nealon, J.O., Philomina, L.S. (2019) IntFOLD: an integrated web resource for high performance protein structure and function prediction. *Nucleic Acids Res.* **47**, W408-W413, doi:10.1093/nar/gkz322.
- Shao, H., He, X., Achnine, L., Blount, J.W., Dixon, R.A., Wang, X. (2005) Crystal structures of a multifunctional triterpene/flavonoid glycosyltransferase from *Medicago truncatula*. *Plant Cell* **17**, 3141-3154
- Waterhouse, A.; Bertoni, M.; Bienert, S.; Studer, G.; Tauriello, G.; Gumienny, R. et al. (2018): SWISS-MODEL: homology modelling of protein structures and complexes. *Nucleic acids research* **46** (W1), W296-W303. DOI: 10.1093/nar/gky427.
